1  
2  
3  
4  
5  
6  
7  
8  
9  
10  
11  
12  
13  
14  
15  
16  
17  
18  
19  
20  
21  
22

**Acoel single-cell transcriptomics: cell-type analysis of a deep branching bilaterian**

Jules Duruz<sup>1</sup>, Cyrielle Kaltenrieder<sup>1</sup>, Peter Ladurner<sup>2</sup>, Rémy Bruggmann<sup>3,4</sup>, Pedro Martínez<sup>5,6,\*</sup> and Simon G. Sprecher<sup>1,\*</sup>

<sup>1</sup>Department of Biology, Institute of Zoology, University of Fribourg, Chemin du musée 10, CH-1700 Fribourg, Switzerland; <sup>2</sup>Institute of Zoology and Center of Molecular Bioscience Innsbruck, University of Innsbruck, Technikerstr. 25, A-6020, Innsbruck, Austria; <sup>3</sup>Institute of Cell Biology, University of Bern, Baltzerstrasse 4, CH-3012 Bern, Switzerland; <sup>4</sup>Interfaculty Bioinformatics Unit, University of Bern, Baltzerstrasse 4, CH-3012 Bern, Switzerland; <sup>5</sup>Departament de Genètica, Universitat de Barcelona, A v. Diagonal, 643, 08028-Barcelona, Catalonia, Spain; <sup>6</sup>Institut Català de Recerca i Estudis Avancats (ICREA), Passeig de Lluís Companys, 23, 08010 Barcelona, Spain

\* corresponding authors: [pedro.martinez@ub.edu](mailto:pedro.martinez@ub.edu); [simon.sprecher@unifr.ch](mailto:simon.sprecher@unifr.ch)

23 **Abstract**

24 Bilaterian animals display a wide variety of cell types, organized into defined  
25 anatomical structures and organ systems, which are mostly absent in pre-bilaterian  
26 animals. Xenacoelomorpha are an early-branching bilaterian phylum displaying an  
27 apparently relatively simple anatomical organization that have greatly diverged from  
28 other bilaterian clades. In this study, we use whole-body single-cell transcriptomics on  
29 the acoel *Isodiametra pulchra* to identify and characterize different cell types. Our  
30 analysis identifies the existence of ten major cell-type categories in acoels all  
31 contributing to main biological functions of the organism: metabolism, locomotion and  
32 movements, behavior, defense and development. Interestingly, while most cell clusters  
33 express core fate markers shared with other animal clades, we also describe a  
34 surprisingly large number of clade-specific marker genes, suggesting the emergence  
35 of clade-specific common molecular machineries functioning in distinct cell types.  
36 Together, these results provide novel insight into the evolution of bilaterian cell-types  
37 and open the door to a better understanding of the origins of the bilaterian body plan  
38 and their constitutive cell types.

## 39 Introduction

40

41 The emergence and early diversification of bilaterians remains a widely debated  
42 subject. Identification and characterization of cell types that makes up animals is key  
43 to understanding the diversity of bilaterian tissues and morphologies. The recent  
44 advent of single-cell transcriptomics provides a unique technical entry point to view the  
45 expression profile of individual cells, enabling us to investigate cell-type identities in  
46 various organisms.

47 Xenacoelomorpha are a recently established phylum of bilaterians (Philippe et  
48 al. 2011) whose phylogenetic position has long been a source of debate, because of  
49 extreme morphological diversity within the phylum, particularities in their anatomy and  
50 the fast-evolutionary rate of their genomes. Some anatomical features of  
51 Xenacoelomorpha appear similar to non-bilaterian clades such as the absence of a  
52 through-gut, the lack of a coelom, the sole use of cilia for locomotion and the apparent  
53 lack of an excretory system. However, they display some core bilaterian features such  
54 as a centralized nervous system with diverse levels of organization in  
55 Xenacoelomorpha. Mature Xenoturbellida appear to lack a clearly identifiable central  
56 nervous system (Raikova et al. 2000) while many members of the subgroup  
57 Acoelomorpha contain centralized brains and various amounts of nerve cords (Achatz  
58 and Martinez 2012; Martinez, Hartenstein and Sprecher 2017). The variability of tissue  
59 architectures has also been demonstrated for other tissues such as the musculature,  
60 the mouth and pharynxes and the copulatory organs (Achatz et al. 2013). This  
61 apparent flexibility of tissue organization is prominent within the Xenacoelomorpha and  
62 highlights the uniqueness of the clade for understanding the mechanisms that regulate  
63 the evolution of morphologies and their constitutive building units: the cell types.

64 Because their anatomical and morphological features seem to share  
65 characteristics with those of both cnidarians and bilaterians, this phylum has been at  
66 the center of an ongoing debate regarding their use as proxies for an ancestral  
67 bilaterian (Baguñà and Riutort 2004; Baguñà et al. 2008; Cannon et al. 2016).  
68 Acoelomorphs had been initially thought to be plathelminths due to their similar  
69 superficial aspect, but later genetic analysis placed them either as sister group to the  
70 remaining bilaterians (Ruiz-Trillo et al. 1999) or within deuterostomes, as a sister group  
71 to Ambulacraria (Philippe et al. 2011). A later study taking into account supplementary

72 genomic and transcriptomic data from several species and refined evolutionary models  
73 placed Xenacoelomorpha as a sister group to all other Bilaterians (Nephrozoa) making  
74 it a candidate phylum to better understand bilaterian origins (Cannon et al. 2016). The  
75 use of alternative models of gene evolution have questioned that phylogenetic position  
76 (Philippe et al., 2019). In fact, these alternative suggestions of phylogenetic affinities  
77 reflect general methodological problems involved in the use of phylogenomic tools and  
78 models to reconstruct early diverging clades (Kapli et al. 2020), a problematic that  
79 remains unsolved with current approaches.

80 Few species of acoels (Acoela) have so far been kept in laboratory conditions  
81 and used for research. The acoels *Symsagittifera roscoffensis*, *Hofstenia miamia* and  
82 *Convolutriloba longifissura* have been used to study photosymbiosis (Dupont et al.  
83 2012; Arboleda et al. 2018), regeneration (Perea-Atienza et al. 2013; Bailly et al. 2014;  
84 Srivastava et al. 2014; Sprecher et al. 2015; Srivastava et al. 2017; Gehrke et al. 2019),  
85 nervous system morphology and development (Bery et al. 2010 ; Semmler et al. 2010 ;  
86 Perea-Atienza et al. 2018) and body patterning (Hejnol & Martindale 2008; Hejnol &  
87 Martindale 2009; Moreno et al. 2009). A particularly interesting, and tractable, system  
88 is the acoel *Isodiametra pulchra*. Since its original description (Smith and Bush 1991),  
89 the use of this species in the laboratory has been gaining acceptance because of their  
90 easy maintenance and of the availability of different technologies, from in situ and  
91 immunochemistry to the gene knockdown using RNAi interference (DeMulder et al.  
92 2009; Moreno et al. 2010) and transcriptome sequences (Cannon et al. 2016; Brauchle  
93 et al. 2018). *Isodiametra pulchra* has been instrumental in developing many key  
94 studies of the Xenacoelomorpha, for instance: detailed descriptions of stem-like cells  
95 (DeMulder et al. 2009), the nervous system (Achatz & Martinez 2012), mesoderm  
96 (Ladurner et al. 2000; Rieger et al. 2003; Chiodin et al. 2013) or excretory cells  
97 (Andrikou et al. 2019).

98 Recent advances in single-cell RNA sequencing technologies have enabled the  
99 thorough description of the full repertoire of cell types (cell atlas) of various organisms  
100 by defining cell types as groups of cells clustered based on their RNA expression  
101 profiles. This has been done in many animals including both non-bilaterians (Sebe-  
102 Pedros et al., 2018a, Sebe-Pedros et al., 2018b, Siebert et al., 2019) and some  
103 bilaterian “model” organisms, for instance: the planarian *Schmidtea mediterranea*  
104 (Fincher et al. 2018; Plass et al. 2018; Swapna et al. 2018), *Drosophila melanogaster*  
105 (Karaikos et al. 2017), *Mus musculus* (Han et al. 2018), the nematode *C. elegans*

106 (Packer et al. 2019) and the annelid *Platynereis dumerilii* (Achim et al. 2018) among  
107 others. These different studies have all revealed a surprising level of cell type  
108 heterogeneity and the presence of previously unknown cell-types in these animals.

109 In this study, we deep-sequenced whole *Isodiametra pulchra* hatchlings at a  
110 single-cell resolution to reveal the diversity of cell types in this representative of the  
111 enigmatic phylum Xenacoelomorpha with the aim of understanding how these different  
112 cells contribute to the organization of its specific body plan. We find a rich diversity of  
113 cell types corresponding to well-known bilaterian tissues. Particularly remarkable is the  
114 diversity within the nervous system of *I. pulchra*. We further describe cells involved in  
115 diverse metabolic activities such as digestion and excretion. Interestingly, we find a  
116 variety of putative secretory cells that may play a role in defense and innate immunity  
117 and others that are putatively involved in the secretion of adhesive substances.  
118 Interestingly, while most cell types of *Isodiametra pulchra* express well known cell-type  
119 markers shared with other animal clades we also observe large numbers of co-  
120 expressed genes, which appear only to be present in Xenacoelomorpha  
121 (*Symsagittifera roscoffensis* and *Xenoturbella bocki*) suggesting the presence of a  
122 phylum-specific group of genes contributing to the establishment of cell-type identities  
123 among the Xenacoelomorpha.

124

125

## 126 **Results**

127

### 128 ***Isodiametra pulchra* single-cell transcriptomes depict a repertoire of 10 major** 129 **cell type categories**

130

131 The analysis of single-cell RNA sequencing of whole *I. pulchra* hatchlings resulted in  
132 an estimate of 14,864 recovered cells, after aggregation of two independent  
133 experiments, resulting in approximately a 14x coverage of the expected cell number in  
134 a whole hatchling that we estimated to be in the range of 900-1000cells. This latter  
135 number was determined by automated counting of stained nuclei in a 3D-reconstructed  
136 confocal microscopy stack of a whole hatchling (Fig 1C). The median Unique Molecular  
137 Identifiers (UMIs) and gene-per-cell estimates were of 608 and 405 respectively with  
138 a total of 21,597 genes detected. The UMI values are consistent with those of other  
139 studies, with the understanding that these numbers are extremely variable from one  
140 species to the other and sometimes even from one experimental condition to another  
141 in the same species (Fincher et al. 2018; Sebe-Pedros et al. 2018a, 2018b; Swapna  
142 et al. 2018). The mean reads per cell was of 49,404; post-normalization. The data was  
143 filtered to only include cells with a gene-per-cell count of 200 to 2000 to exclude cells  
144 of poor quality and possible multiplets (Supp data, S2). Cells were clustered using 25  
145 principal components selected in base of the assessment of an elbow plot that ranks  
146 principle components according to the percentage of variance that they explain (Satija  
147 et al. 2018; Supp. data S2) and with a resolution of 2.5. This resulted in the detection  
148 of a total of 42 clusters (Supp. data S2). Identity was assigned to these clusters by  
149 analyzing the best markers of each cluster, which are the genes that were most  
150 differentially upregulated in one specific cluster with respect to all others.

151 Clusters were manually annotated and fitted into ten subjectively defined  
152 categories based on the predicted function of identified markers (Fig 1A) which also  
153 included a category of uncharacterized cell types. In addition we identified what  
154 appeared to be prokaryotic sources, based on the identification of some bacterial rRNA  
155 sequences. These prokaryotic sequences could reflect the presence of endosymbionts  
156 in *Isodiametra pulchra*, since the same transcripts were found in both the single-cell  
157 pools and the RNA sequences used for transcriptome assembly. A few representative  
158 markers of each category were plotted to visually assess their enrichment within each

159 cell cluster (Fig 1B). Defined categories include stem-cells, neurons, two distinct types  
160 of digestive cells, two distinct types of epithelial cells, secretory cells and muscle cells.

161

162

### 163 **Stem cells express piwi-like genes and conserved proliferation markers**

164

165 An interesting problematic in the field of stem cell biology is the putative convergence  
166 of neoblast phenotypes in the Platyhelminthes and the Acoela. Here, we adress this  
167 topic by analyzing piwi positive cells (a specific marker for stem cells) in *Isodiametra*  
168 *pulchra*. Specifically, a population of cells with stem cell-like profiles was identified  
169 based on the broad expression of *piwi-like 1* and *piwi-like 2* (De Mulder et al. 2009);  
170 those profiles are mainly aggregated in two clusters of cells (Fig 2A, 2B) both of which  
171 express a variety of other genes involved in proliferation, cell growth, DNA replication,  
172 organelle biosynthesis and protein synthesis (Fig 2A). While most of these markers  
173 are concentrated within two clusters many other cell types seem to have cells sharing  
174 an elevated expression of piwi-like genes (Fig 2B).

175

176

### 177 ***Isodiametra pulchra* nervous system displays a high diversity of sensory cell** 178 **types**

179

180 Because of the high number of clusters with neuronal profiles (10 clusters in total), all  
181 the cells from these clusters were batched together and sub-clustered using 10  
182 principal components and a resolution of 0.6 to obtain finer distinctions between  
183 neuronal subtypes. This procedure resulted in a total of 12 neuronal sub-clusters. The  
184 clusters were sorted into categories defined based on the expression of certain specific  
185 markers (Fig 3A). A large population of cholinergic neurons was identified based on  
186 the broad expression of *choline acetyl-transferase* (Slemmon et al. 1991; Kim et al.  
187 2006; Achatz and Martinez 2012). Presumed neuronal precursors or differentiating,  
188 immature neurons were characterized based on the expression of growth-factor-  
189 related genes (*epidermal growth factor like-1*, *cd63*), DNA synthesis (*elongation factor*  
190 *1A2*, *DNA primase/helicase*) and mitosis markers (*microtubule-associated proteins*  
191 *RP/EB*). Another cluster was characterized by the expression of several Transient  
192 Channel Potential (TRPs) orthologs (*trpc5a*, *trpc5b*, *trpc4*, *trpa1*), which are classically

193 associated with sensory functions (Rubin 1989; Brauchi et al. 2006; Montell & Peng et  
194 al. 2015; Kozma et al. 2018). However, due to the absence of other clear sensory  
195 markers in these clusters, they were simply called TRP<sup>+</sup> neurons. To visualize the  
196 domains of expression of TRPC5 the expression was assessed using a single-  
197 molecule fluorescent In Situ hybridization (smFISH) technique (Stellaris, LGC  
198 biosearch technologies). We observed a clear expression domain located in the  
199 anterior tip of the animal (Fig 3C) and in the periphery of the brain. The revealed pattern  
200 indicates that some TRPC5<sup>+</sup> cells are closely connected to the brain, either as a  
201 sensory input or as part of the CNS itself. The absence of photosensory neurons in  
202 this species has been mentioned by different authors but has never been studied in  
203 detail. In this context, we performed an additional analysis of TRP<sup>+</sup> neurons with the  
204 aim of looking for possible correlations between TRP and Opsin expression levels  
205 (Supp fig S3). This analysis revealed that TRP<sup>+</sup> neurons also express more opsins  
206 than any other clusters suggesting that some of these cells could indeed be functioning  
207 as photoreceptor neurons.

208 Serotonergic neurons were identified by the expression of a serotonin  
209 transporter (*sc6a4*) (Blakely et al. 1991; Corey et al. 1994; Chang et al. 1996). High  
210 expression of the microtubule stabilizer *saxo2* indicated that these cells are likely  
211 ciliated, which could serve a mechanosensory function. Immunostainings with  
212 antibodies against serotonin highlighted a population of serotonergic neurons in the  
213 brain of the animal with cell bodies located towards the anterior tip (Fig 3C). These  
214 neurons display a bipolar morphology that appears to connect the tip of the animal to  
215 the CNS supporting their presumed function as sensory cells. Immunoreactivity of  
216 serotonergic neurons have been documented in previous studies (Achatz and  
217 Martinez 2012; Dittman et al. 2018) but were rather described as a component of the  
218 CNS and not necessarily as sensory cells.

219 Four clusters of distinct cell populations were identified as chemosensory,  
220 based on the expression of different combinations of amiloride-sensitive sodium  
221 channels and acid-sensing sodium channels (Supp. table 2). Chemosensory cells  
222 could be resolved into two distinct populations with one expressing predominantly  
223 glutamate receptors (*NMDA-1*, *Glr1*, *Grl2*) and the other expressing predominantly  
224 acetylcholine receptors (*AChR-1*, *AChR-2*, *AChR-3*, Fig 3A). This suggests that these  
225 sensory cells likely do not only have the ability to respond to chemical stimuli from the  
226 environment but also to be modulated by other neurons. The detection with smFISH



227 for the amiloride-sensitive sodium channel *scnng* revealed instances of expression in  
228 the proximity of the brain but also in close proximity to the mouth opening (with often  
229 observed background in the digestive syncytium) (Fig 3C). The expression pattern is  
230 consistent with the presumed function of these cells to sense chemical compounds in  
231 the environment during navigation but also when grazing on algae.

232 One cluster of identified cells is possibly involved in providing nutrients to the  
233 nervous system since they express several lipoproteins receptors (*ldlr1*, *lrp2*). The  
234 function of these cells is uncertain, but they could be providing metabolic support to  
235 the nervous system in a glial cell-like manner but due to the broad expression of many  
236 lipoprotein receptors in other cell types it is not sufficient to support that hypothesis.  
237 However, since tentative glial cells have been identified already in another acoel,  
238 *Symsagittifera roscoffensis* (Bery et al. 2010), this remains a plausible hypothesis.

239

240

241

## 242 **Digestion and nutrient transport can be shared within a single cell type**

243

244 All clusters previously identified as digestive cells (I & II) were analyzed. Digestive cells  
245 were characterized by the expression of various digestive enzymes such as peptidases  
246 and lipases (Fig 4A) and interestingly by the expression of a broad variety of  
247 cathepsins known for their catabolic activity but usually inside lysosomes. Cathepsins  
248 have been previously described as markers for a novel cell type in *Schmidtea*  
249 *mediterranea* (Fincher et al. 2018; Swapna et al. 2018) however, we show here with  
250 the co-expression of cathepsins and other digestive enzymes that their function in  
251 acoels is likely to contribute to digestion of food. Whether this digestion happens  
252 through secretion of these enzymes into the digestive syncytium or intracellularly  
253 remains unknown. In the case of *Isodiametra pulchra* as well as many other  
254 acoelomorphs, digestion is supposed to be carried out by the digestive syncytium, a  
255 very large polynucleated cell capable of engulfing and digesting food (Gavilán et al.  
256 2019); though it is unclear whether additional cells in the periphery are also involved.  
257 Our experimental procedure was designed to dissociate and isolate individual cells  
258 and therefore excluded the digestive syncytium from the experimental system.  
259 Strikingly, our data shows clearly that there are other cell types also contributing to the  
260 digestion of nutrients. These cells are likely to be layering the digestive syncytium to

261 either take in food particles from the syncytium and digest them intracellularly and/or  
262 directly secrete digestive enzymes into the syncytium. This assertion is further  
263 supported by the expression pattern of cathepsin B shown by In Situ hybridization in  
264 cells surrounding the mouth opening (Fig 4C).

265 Cells expressing nutrient and ion transporters were identified (Fig 4A). These  
266 cells could be serving the function of both distributing nutrients to other cells and/or,  
267 like an excretory system, to filtrate and reabsorb necessary elements while discarding  
268 waste. The existence of such an excretory cell type in *I. pulchra* was previously  
269 proposed in Andrikou et al. (2019). We looked for the genes tested as excretory  
270 markers in that study and found high expression levels of *nephrin/kirre* and *aquaporin*  
271 *b* in a large population of these transporter-rich cells, consistent with their hypothesis.

272 Several clusters express a mix of digestive enzymes and transporters  
273 suggesting an ability to serve both functions of secreting digestive enzymes and taking  
274 up the processed nutrients suggesting the presence of cellular variegated phenotypes  
275 (Fig 4A).

276

277

## 278 **Acoel epithelial and secretory cells predict high functional diversity**

279

280 Epithelial and secretory cells were analyzed together because of the shared  
281 expression of some common markers (spondins, lectins, cadherins, fibrillins), even  
282 though we have seen that they are highly diversified and composed of many subtypes.  
283 These populations of cells were separated into three categories: epithelial, secretory  
284 and motor ciliated cells, each containing several sub-categories based on differential  
285 marker expression (Fig 5A, 5B). Epithelial cells were mainly defined by the expression  
286 of the transcript for *mucin-like*, a secreted protein characteristic of epithelia in many  
287 animal species (Marin et al. 2008), and of multiple cadherins and protocadherins  
288 responsible for cell-cell adhesion, critical for epithelium formation. These cells also  
289 expressed *sortilin-like* receptors (Mazzella et al. 2019), which are broadly studied in  
290 vertebrates but are of unknown function in invertebrates. Interestingly, this cell type  
291 category expresses a *myosin-11* ortholog that could be an indicator of cell contractility.

292 Secretory cells were one of the most diverse group of identified cell types in our  
293 dataset. Many genes identified in this clusters had no known orthologues making it  
294 difficult to assess cell-type identity, but they nevertheless shared some conserved core

295 markers: most of these cells express at least one type of fibrillin, and/or spondin.  
296 Expression of lectins, fucoselectins, as well as cysteine-rich venom-related proteins (*va5*,  
297 *vp1*), suggest a possible involvement in defense against predators and/or pathogens.  
298 A subset of these cells strongly expressed an ortholog of an *adhesive plaque matrix*  
299 *protein*, a protein known to form a strong glue-like substance that is molded into  
300 holdfast threads in the mussel *Mytilus galloprovincialis* (Inoue & Odo 1994).

301 Motor ciliated cells were characterized by the very high expression of tubulins,  
302 presumably involved in motile cilia formation as well as dyneins known to be involved  
303 in the movements of those cilia. Dyneins are also frequently found in other epithelial  
304 cells (Fig 5A), indicating that they might not be the only cell type with motile cilia.  
305 Whether these motor ciliated cells are used in locomotion remains unknown.

306 The general aspect of the external epithelium of *I. pulchra* could be observed  
307 with immunostainings against acetylated tubulin which reveals the density of cilia on  
308 the external epithelium of the animal (Fig 5C). A commercial antibody directed against  
309 the Delta protein from *Drosophila* revealed the morphology of the cells that compose  
310 the epithelium and we therefore used it as marker to delineate their shape. Together  
311 with phalloidin staining this antibody shows the disposition of actin-layered pores that  
312 may be involved in secretion (Fig 5C).

313 SmFISH for *adhesive plaque matrix protein* (secretory cells) and *SCO-Spondin*  
314 *3* (Secretory cells) and *Fucoselectin-6* (Epithelial cells) seemed to show scattered  
315 patterns of expression throughout the superficial layer of the body with slightly higher  
316 occurrence in the anterior half of the animal (Fig 5D). This suggests that secretory cells  
317 in acoels are not only grouped in specific secretory glands (Klauser, 1986, Pedersen,  
318 1965) but can also be present throughout the epithelium. Additionally, the expression  
319 of cadherins and protocadherins in some secretory cells may indicate that they use  
320 these proteins to attach to the epithelium. Based on the data collected for different  
321 types of secretory cells, it seems probable that, at least, some of these cells are  
322 involved in processes of active external secretion (i.e mucus; Klauser 1986) or in innate  
323 defense mechanisms.

324

325

326 **Muscle cells show high marker conservation with other bilaterians**

327

328 Specific genes involved in the formation of contractile fibers enabled the  
329 characterization of three clusters of muscle cells (Ladurner & Rieger 2000; Rieger &  
330 Ladurner 2003; Raz et al. 2017). Major components of contractile fibers such as  
331 *myosin heavy chain*, *myosin light chain*, *troponin*, *sarcalumenin* and *tropomyosin* are  
332 broadly expressed in two of those clusters (Fig 6A). Interestingly, certain markers  
333 suggest similarities between muscle cells and epithelial cells. For instance, laminin,  
334 which is a major component of the basal lamina of epithelia appears here to be broadly  
335 expressed in muscle cells. These similarities are reflected on the UMAP plot in which  
336 the main muscle cell clusters is relatively close to epithelial cells with the consistent  
337 appearance of a smaller cluster that seems to bridge clusters of muscle and epithelial  
338 cells (Fig 6B). This latter cluster would suggest the presence of a set of muscle cells  
339 that share markers with epithelial cells (*cadherin*, *protocadherin-1*, *protocadherin-2*  
340 *and fucoselectin-6*) which are mostly involved in cell-cell adhesion. This could indicate  
341 that these muscle cells are anchored to the epithelium through cadherins. Since acoels  
342 rely on the sole use of cilia of epithelial cells for locomotion it is likely that there must a  
343 close coordination between the function of the ciliated epithelium and contractile  
344 muscle to modulate movements.

345 Muscle cells are one of the few cell types in which defining transcription factors  
346 can be identified in our dataset: The transcription factors *krueppel-like* and *COUP* are  
347 specifically detected in muscle clusters. In addition, the *wnt* interacting partner *frizzled*  
348 is specifically expressed in all three of these muscle clusters (Fig 6A). The whole  
349 structure the muscle network of *I. pulchra* can be observed with phalloidin staining of  
350 actin filaments (Fig 6C). Additional ISH for tropomyosin showed high expression in or  
351 around the gonads (Fig 6C).

352 Interestingly, most of these presumed muscle cells also express several types  
353 of acetylcholine receptors (*AChR-4*, *AChR-5*, *AChR-6*), indicating that the  
354 neuromuscular junctions are likely mediated by cholinergic neurons (see: Fig 3).

355

### 356 **Cell-type markers are conserved within the Xenacoelomorpha**

357

358 In an attempt to detect the presence of both Acoela-specific and Xenacoelomorpha-  
359 specific cell types or signatures, we extracted the sequences of *I. pulchra* for which we  
360 could not identify orthologs in other clades and compared them to other  
361 Xenacoelomorpha transcriptomes we have produced in the laboratory (*Symsagittiera*

362 *roscoffensis* and *Xenoturbella bocki*). As a result, we identified 4332 unknown  
363 sequences that have homologous sequences in *S. roscoffensis* and 3063 in *X. bocki*.  
364 We observed that all Xenacoelomorpha-specific sequences found among the cell-type  
365 markers were also present in the group “Acoela-specific”, with only one exception  
366 (*DN18593*), suggesting that these genes’ sequences are well conserved among  
367 Xenacoelomorpha, even though they do not have similarities with sequences of other  
368 phyla. They represent a collection of very derived sequences that could still represent  
369 orthologues of other genes but highly modified or alternatively represent  
370 Xenacoelomorpha-specific novelties. The fact that they are expressed in all three  
371 species also indicates that they are likely to be functionally relevant. We initially looked  
372 for these genes in the group of “uncharacterized” cell types but the fraction of Acoela-  
373 and Xenacoelomorpha-specific sequences in these clusters was not higher than in other  
374 clusters with assigned phenotype. This prompted us to avoid characterizing them as  
375 novel Xenacoelomorpha-specific cell types. However, the relevance of these genes  
376 should not be discounted since they are abundantly present in many of the better  
377 characterized cell types, particularly in digestive, epithelial and secretory cells plus also  
378 in some of the sensory cell types.

379 To conclude, the expression of well-known orthologs of bilaterian cell markers  
380 in this dataset has been sufficient to classify cell types into different functional  
381 categories. However, and surprisingly, it appears that each of these categories show  
382 significant expression of transcripts shared only within Xenacoelomorpha (clade-  
383 specific transcripts). At this point, however, we cannot rule out the possibility that *I.*  
384 *pulchra* have some specific cell types, though the data would better fit a model in which  
385 all cell types of Acoela show some unique transcriptional profiles different from those  
386 of the remaining bilaterians. Further analysis of the genome of *Isodiametra pulchra* as  
387 well as other members of the clade could help clarify that issue and more accurately  
388 describe gene conservation among Xenacoelomorpha and their putative relationship  
389 with those of other phyla (Guijarro-Clarke et al. 2020).

390

391

## 392 **Discussion**

393

394 The insights into cell-type diversity through single-cell RNAseq experiments provides  
395 a powerful way to approach cell-type evolution in a highly reproducible manner. In this

396 study, we provide a cell atlas of the juvenile acoel *Isodiametra pulchra* that displays  
397 functionally distinct cell types. This is the first time that a high-resolution expression  
398 atlas is provided for any member of the enigmatic group Xenacoelomorpha. While the  
399 amount of predicted cell types is consistent with what has been morphologically  
400 characterized in the past, the newly characterized subsets of cells and the specific  
401 genes expressed in each of these subsets offer valuable tools to further characterize  
402 the histology and developmental trajectories of these animals.

403 The nervous system of *I. pulchra* could now be described at the level of individual  
404 cells providing additional information about the chemical modalities of  
405 neurotransmission of acoel neurons. We identified distinct types of sensory cells that  
406 could be involved in chemosensation, mechanosensation and possibly  
407 photosensation. In addition to improving our understanding of the nervous system of  
408 acoels, this provides an entry point to functional and behavioral studies in which the  
409 described sensory markers could be stimulated or tampered with to better understand  
410 the specific role of each sensory cell type. The enormous plasticity of nervous system  
411 architectures in the Xenacoelomorpha has now a cellular reference frame for us to  
412 understand the building blocks that give rise to this great diversity.

413 We showed that digestion and transport of nutrients was probably carried out  
414 by a variety of cell types that secrete different digestive enzymes, including several  
415 members of the cathepsin family. These digestion processes are likely to act together  
416 with the digestive syncytium, though it remains unclear whether the enzymes are  
417 secreted into the syncytium or act as processes of intracellular digestion. This can be  
418 the case with certain types of cathepsins that are predominantly present in lysosomes  
419 in various species (Kirschke et al. 1995). The detection of several digestive enzymes  
420 opens the possibility of better understanding one of the most enigmatic tissues of  
421 Xenacoelomorpha, the gut (Gavilán et al. 2019). Other cell types were shown to  
422 express high levels of nutrient and ion-transport related transcripts, indicating a  
423 possible function in nutrient absorption and active distribution of these nutrients to  
424 other cells. In addition, one cell cluster expresses markers that have been previously  
425 proposed as having a role in excretory processes in *I. pulchra* (Andrikou et al., 2019),  
426 suggesting an involvement of these cells in the elimination of metabolic waste.  
427 Interestingly, some cell types simultaneously express markers of both digestive  
428 enzyme and nutrient/ion transport. This could indicate that these cells have dual roles  
429 (Gazizova et al. 2017) or that we have captured progenitors that later on give rise to

430 two phenotypically distinct cell types. Since very little is known on the maturation  
431 process of the gut, both alternatives remain possible. Together, these results show for  
432 the first time that the digestive system of acoels consists of more than just a simple,  
433 homogeneous, digestive syncytium but that it encompasses many cell types that seem  
434 to assume different and distinct roles for digestion.

435 We provide new information about the epithelia of *I. pulchra* by describing two  
436 main categories of epithelial cells whose phenotypes suggest distinct functions. One  
437 category seems to express more classic structural elements of epithelia while the other  
438 express markers of motor cilia which suggests an involvement in the locomotory  
439 behavior, which in acoels relies exclusively on ciliary motion. Our data suggests that  
440 the movements of these motor cilia are mediated by axonemal dyneins known to be a  
441 major component of cellular motors in many eukaryotes including unicellular protists  
442 (King 2012).

443 The presence of secretory cells and glands in different Xenacoelomorpha have  
444 been thoroughly described at the morphological level (Pedersen 1965; Klauser 1986),  
445 with mucus secretion in *Symsagittifera roscoffensis* (Acoela) proposed as an aid to  
446 locomotion (Martin 2005). In this study we extended this knowledge by describing the  
447 diversity of secretory cell types that suggest a broad variety of functions such as  
448 adhesion and defense against predators or pathogens. This first molecular description  
449 of secretory systems of an acoel provides important elements to compare secreted  
450 products such as bioadhesive proteins and toxins to those of other animals and follow  
451 their expression over evolutionary time (Tyler 1976).

452 The peculiarity of acoel cell types compared to other bilaterians could be  
453 anticipated given the long time that the clade has evolved independently and the fast  
454 rate of nucleotide substitution that characterize their genomes. This is a group an  
455 ancient bilaterians that diversified around 500-600 Mya. This combination of old clade  
456 diversification and the fast rate evolution of their genomes may obscure the similarity  
457 of their genes with those of other animals, resulting in an added difficulty for detecting  
458 sequence similarities. However, and in spite of the contribution of these factors, our  
459 results show that instead of predicting a large number of novel cell types, *I. pulchra*  
460 displays an array of known cell types that express a combination of some conserved  
461 markers plus some clade-specific ones. Many of the latter sequences are, indeed,  
462 conserved across the different Xenacoelomorpha pointing to the presence of some  
463 specific functions carried out by conserved cell types. This shows that despite their

464 important diversity, Xenacoelomorpha possess some clade-specific conserved genes  
465 as is the case for other phyla (Paps and Holland 2018). How these sequences  
466 contribute to the specific character of the Xenacoelomorpha cell types remain to be  
467 studied.

468 Together, our results pave the way for the further analysis of the different roles  
469 that these different cell types have in the morphology and physiology of acoels.  
470 Moreover, our results identified candidate markers for elusive cell populations such as  
471 multipotent stem cells or secretory cells and help us build a molecular map of most  
472 organ systems. For the first time, we provide a thorough analysis of gene expression  
473 in acoel individual cells. The description of a catalog of cell-types in *Isodiametra*  
474 *pulchra* should help us understand bilaterian evolution through the perspective of its  
475 cellular constituents. This is a powerful way to access to the constructional principles  
476 that guide the different morphologies of Xenacoelomorpha or any other animal, by  
477 helping to understand the diversity and arrangement of their cellular building blocks.  
478 The presence of cell types with mixed signatures and the generalized usage of clade  
479 specific transcripts are especially relevant since they should explain the specificities of  
480 Xenacoelomorpha tissues and their functional activities. With the data provided here  
481 and the implementation of cross-species analysis of single cell transcriptomic data, the  
482 possibility of tracing the evolutionary histories of cell types becomes a reachable  
483 objective. Single-cell data and its translation into cell type characters, will be of special  
484 interest for also tracing the evolutionary history of many clades. We hypothesize that  
485 this source of data should help us, in addition, to understand the phylogenetic affinities  
486 of Xenacoelomorpha.

487

## 488 **Materials and methods**

489

### 490 **Animal culture and breeding**

491 Animals were kept at 20°C in glass petri dishes. They were fed by being transferred  
492 on a freshly grown biofilm of the diatom *Nitzschia curvilineata* every 6 weeks.  
493 Hatchlings were collected and identified for the experiment based on size. All animals  
494 were starved few hours prior to RNAseq experiments to avoid excessive algae  
495 contamination.

496



## 497 **Single-cell suspension**

498 Whole animals (~100 hatchlings) were dissociated by incubating for 1h at 25°C in a  
499 collagenase solution (1mg/mL, Sigma-Aldrich C9722) with continuous agitation. The  
500 suspension was briefly vortexed every 10min to ensure full digestion. The suspension  
501 was briefly centrifuged (5min, 750rcf) and the pellet was suspended in RNase-free  
502 PBS with 0.04% BSA (Thermo Fischer Scientific AM2616). Cells were filtered through  
503 a 40µM Flowmi Cell strainer (Bel-Art H13680-0040). Centrifugation and resuspension  
504 in PBS were repeated to wash the cells. The whole suspension was then gently  
505 pipetted up and down around 200 times coated pipette tips. The cell concentration was  
506 estimated using a hemocytometer (Neubauer improved – Optik Labor) under a  
507 binocular microscope.

508

## 509 **Transcriptome assembly and annotation**

510

511 RNA was extracted from animals in mixed stages, RNA was purified using a Qiagen  
512 RNA purification kit. The poly-adenylated transcriptomes (mRNA) of *I. pulchra*, *S.*  
513 *roscoffensis* and *X. bocki* were sequenced on an Illumina HiSeq 3000. We generated  
514 a total of 84 930 312, 61 857 037, and 116 117 207 paired-end 150 bp long reads for  
515 *I. pulchra*, *S. roscoffensis*, and *X. bocki*, respectively, and these data sets have been  
516 uploaded to NCBI (accession numbers for *Ip*: SAMN07276911, *Sr*: SAMN07276888,  
517 and *Xb*: SAMN07276887). De Novo assembly was performed using the TRINITY  
518 pipeline and annotation was done using TRINOTATE (v3.1.1, Bryant et al., 2016).  
519 BLAST (v2.7.1) homology pairing was performed against the SwissProt database. The  
520 name assigned to genes in this study corresponds to the Blastx result with lowest e-  
521 value. Protein domain (Pfam) search was done using HMMER (v3.1b2).

522

523 The poly-adenylated transcriptome of *Isodiametra pulchra* was generated on an  
524 Illumina HiSeq 3000 and generated 84,930,312 paired-end 150bp long reads  
525 (Brauchle et al., 2018). This initial transcriptome assembly of *Isodiametra pulchra*  
526 revealed ~300,000 transcripts. The very high number of identified transcripts was  
527 determined to be caused by both the presence of shorter reads that could not be  
528 confidently mapped to other transcripts and because of the existence of many  
529 transcriptional isoforms for certain genes. To enable better mapping of the reads  
530 obtained in single-cell RNA sequencing experiments we reduced redundancy in our

531 transcriptome . The final number of transcripts in the non-redundant transcriptome is  
532 of 45,000.

533       Completeness of the transcriptome was tested by BLASTing the transcriptome  
534 against BUSCOs (Benchmarking Universal Single Copy Orthologs, Simão et al., 2015,  
535 Seppey et al., 2019, v3.0.2) as defined for all Metazoa (978 genes). Out of these 978  
536 genes, 732 were found in our non-redundant transcriptome, either as a single-copy or  
537 as duplicated genes, 61 were fragmented and 185 were not found (Supp. fig S1B).  
538 This corresponds to an estimation of 74.8% of BUSCO groups that could be identified  
539 in our non-redundant transcriptome, either as a single-copy or as duplicated genes.  
540 The list of missing BUSCOs is available in supplementary table 3. We performed the  
541 same analysis our redundant transcriptome and obtained better results with 326 single-  
542 copy, 542 duplicated BUSCOs, 25 fragmented and 85 missing. This showed a higher  
543 proportion of identified BUSCOs (88.7%) but with a very high proportion of duplicated  
544 genes (55.4%), indicating the important redundancy of this transcriptome.

545 Functional annotation based on Blastx similarity searches in a general protein  
546 database (Swissprot) and a database of curated protein domains (Pfam) was  
547 performed on the assembled transcriptome. About half of these transcripts had clear  
548 similarities to proteins of the database (e-value  $\leq 0.01$ ) and/or a predicted protein  
549 domain. The annotation reveals that the *I.pulchra* transcriptome contains 20,446  
550 sequences with orthologous in other organisms leaving 24,554 transcripts of unknown  
551 identity (Supp. fig S1C). 17,810 transcripts encode for a protein (Open reading frame)  
552 with a conserved structural domain. The others might correspond to acoel-specific or  
553 highly divergent sequences. To assess the conservation of these unknown  
554 genes/sequences within the Xenacoelomorpha and verify that they are not  
555 contamination of our transcriptome, we generated transcriptome assemblies for  
556 *Symsagittifera roscoffensis* (Acoelomorpha) and *Xenoturbella bocki* (Xenoturbellida)  
557 and blasted the unknown sequences from *I. pulchra* (e-value  $\leq 0.01$ ) against them  
558 This process identified 4332 transcripts that have orthologues with *S. roscoffensis* and  
559 therefore may be acoel-specific and 3063 transcripts that have orthologues in *X. bocki*  
560 and might therefore be Xenacoelomorpha-specific (Supp. fig S1A, supp. tables 4&5).

561

562

563

564 **10x genomics**

565

566 Single-cell RNA sequencing experiments were all performed at the Next Generation  
567 Sequencing platform of the university of Bern. scRNA-seq libraries were prepared  
568 using the Chromium Single Cell 3' Library & Gel Bead Kit v2 or v3 (10X Genomics),  
569 according to the manufacturer's protocol (User Guide). Chips were loaded after  
570 calculating the accurate volumes using the "Cell Suspension Volume Calculator  
571 Table". With an initial single-cell suspension concentration estimated at 300 cells/ $\mu$ L,  
572 we targeted to recover approximately 8000 cells. Once GEMs were obtained, reverse  
573 transcription and cDNA amplification steps were performed.

574 Sequencing was done on Illumina NovaSeq 6000 S2 flow cell generating paired-end  
575 reads. Different sequencing cycles were performed for the different reads, R1 and R2.  
576 R1, contained 10X barcodes and UMIs, in addition to an Illumina i7 index and R2  
577 contained the transcript-specific sequences. The total of reads for the combined  
578 experiments was 734,346,794 post-normalization resulting in an average of 49,404  
579 reads per cell.

580 ScRNA-Seq Cell counting and viability assessments were conducted using a DeNovix  
581 CellDrop Automated Cell Counter with an Acridine Orange (AO) / Propidium Iodide (PI)  
582 assay. Thereafter, GEM generation & barcoding, reverse transcription, cDNA  
583 amplification and 3' Gene Expression library generation steps were all performed  
584 according to the Chromium Single Cell 3' Reagent Kits v3 user Guide (10x Genomics  
585 CG000183 Rev B). Specifically, 37.3  $\mu$ L of each cell suspensions (300 cells/ $\mu$ L) were  
586 used for a targeted cell recovery of 7000 cells. GEM generation was followed by a  
587 GEM-reverse transcription incubation, a clean-up step and 12 cycles of cDNA  
588 amplification. The resulting cDNA was evaluated for quantity and quality using  
589 fluorometry and capillary electrophoresis, respectively. The cDNA libraries were  
590 pooled and sequenced paired-end and single indexed on an illumina NovaSeq 6000  
591 sequencer with a shared NovaSeq 6000 S2 Reagent Kit (100 cycles). The read-set up  
592 was as follows: read 1: 28 cycles, i7 index: 8 cycles, i5: 0 cycles and read 2: 91 cycles.  
593 An average of 521,045,087 reads/library were obtained, equating to an average of  
594 65,130 reads/cell. All steps were performed at the Next Generation Sequencing  
595 Platform, University of Bern.

596

## 597 **10x data processing**

598 The single-cell sequencing data was processed with Cell Ranger (10x genomics,  
599 v3.0.2) using the provided pipeline. The reference sequence was obtained by  
600 concatenating the transcriptome in one single sequence with each transcripts  
601 separated by 1000 Ns. Two separate experiments using different BeadKits were  
602 batched together using the provided aggregation function. This resulted in a total of  
603 14,864 cells with a median of 405 genes/cell for a total of ~20,000 genes in total.

604

## 605 **Seurat data processing**

606 Seurat pipeline (v3.1.4, Satija et al., 2015, Butler et al. 2018) was adapted and used  
607 on our dataset. Cells were filtered to include only those with a gene per cell count of  
608 200 to 2000. Seurat objects were log-normalized with a scale factor of 10,000. Variable  
609 genes were identified with the FindVariableGenes function with low and high X cutoffs  
610 of 0.0125 and 3 respectively and a Y cutoff of 0.5. The dataset was then scaled by  
611 applying linear transformation. 25 principal components were selected for clustering  
612 based on an ElbowPlot test. Clustering was performed with a PCA reduction with a  
613 resolution of 2.5. UMAP dimensional reduction was used to plot clusters.

614

## 615 **Immunostainings**

616 Whole animals were fixed for 30min in 4% formaldehyde. Primary antibodies were  
617 used in the following concentrations (mouse anti-dSAP47 1:20, rabbit anti-5HT 1:200,  
618 mouse anti-delta 1:200, mouse anti-acetylated tubulin 1:500). Primary antibodies were  
619 incubated at 4°C overnight and secondary antibodies were added for 2 hours at room  
620 temperature (concentration 1:200). Images were taken with a Leica SP5 confocal  
621 microscope.

622

## 623 **smFISH**

624 Probes were synthesized by Stellaris® (Biosearch technologies). Animals were fixed  
625 for at least 1 hour in 4% formaldehyde at room temperature and subsequently washed  
626 with PBS and transferred in 100% methanol to be stored at -20°C. Specimens were  
627 rehydrated in 1:3, 2:3 and 1:1 PBT. In situ hybridization was done following the  
628 provided protocol for drosophila embryos (*Orjalo et al., 2016*) using hybridization  
629 temperature of 45°C instead of 37°C and reducing the reaction volumes to 100uL per  
630 probe mix. Images were taken with a Leica SP5 confocal microscope.

631

## 632 **InSitu hybridization**

633

634 Animals of all stages were collected from the dish and put in an Eppendorf tube. They  
635 were anaesthetized with 7 % MgCl and fixed with 3.7 % paraformaldehyde in PBTx  
636 (0.3 % Triton X-100 in 1x PBS) for 30 min at room temperature. The washes were done  
637 3 x with PBTx and then dehydrated in methanol. The samples were stored at -20°C for  
638 up to several months.

639

640 Samples were rehydrated in Eppendorf tubes in four steps from 100% methanol to  
641 100% PBT (0.1 % Tween-20 in 1x PBS) and washed 3 x 5min in PBT. A proteinase K  
642 treatment was applied for 8 min at a concentration of 20 µg/ml in PBT. The proteinase  
643 K activity was stopped with 2x5min washes in glycine (4 mg/ml in PBT, *Roth*). A series  
644 of 5 min washes were performed on a shaker set to 30 rpm in the following order: 1%  
645 triethanolamine in PBT, 0.25 % acetic anhydride in 1 % TEA, 0.5 % AA in 1% TEA  
646 followed by three washes in PBT. Samples were refixed in 3.7% paraformaldehyde  
647 solution was used for 20 min at room temperature followed by 5 washes of 5 min in  
648 PBT.

649

650 Before the pre-hybridisation the samples were placed in a 50/50 solution of  
651 hybridisation buffer and PBT for 10 min at RT. The recipe for the hybe buffer was the  
652 following : 50% deionised formamide, 5x SSC (0.75M sodium chloride + 0.075M  
653 sodium citrate), 1% SDS, 0.1% Tween-20, 50 µg/ml heparin, 100 µg/ml herring sperm,  
654 0.01M citric acid. Afterwards the samples were kept in 100% hybe buffer for 2h at 60°C.  
655 The probes were added after having been denatured at 90°C for 5 min and added to  
656 the flask to a final concentration of 1000ng/ml. The hybridisation was performed at  
657 60°C in a water bath for two days.

658

659 The first steps after the hybridisation were done at 60°C in a water bath and in the  
660 following solutions: 100% hybe buffer, 75% hybe buffer 25% 2X SSC, 50% hybe buffer  
661 50% 2X SSC, 25% hybe buffer 75% 2X SSC 5 min each and then 2 x 30 min in 2X  
662 SSCT. The samples were blocked in 1x maleic acid buffer blocking solution for 3h at  
663 4°C. The antibody incubation was performed with a 1: 2000 anti-DIG-AP (Roche) in

664 blocking solution for 12h at 4°C. For staining, an NTMT solution was used with 1:100  
665 NBT/BCiP. Primers used in this study were the following:

| Gene ID               | Gene name    | Forward primer         | Reverse primer           |
|-----------------------|--------------|------------------------|--------------------------|
| TRINITY_DN30349_c0_g4 | Tropomyosin  | TTGACCTCCAC<br>CGACTTC | CCCTCTTTCTCTAC<br>ATCTCC |
| TRINITY_DN23833_c0_g5 | Cathepsin B2 | CCGCACGAGAT<br>ACAACAG | TGGGAAGCAGGGGA<br>GAACT  |

666

## 667 **Acknowledgements and funding information**

668

669 We thank Dr. Pamela Nicholson and her team at the next generation sequencing  
670 facility (NGS) of the university of Bern for their expertise and their help with the single-  
671 cell RNA transcriptomics experiments.

672 This work was supported by the Swiss National Science Foundation to SGS (grants  
673 IZCOZ0\_182957 and 310030\_188471) and by the Agencia Estatal de Investigación  
674 to PM (grant PGC2018-094173-B-I00).

675

## 676 **Data availability**

677

678 Raw data and processed datasets for single-cell transcriptomics are available on  
679 NCBI (accession number GSE154049).

680

## 681 **Tables**

682

683 All tables are available as supplementary data.

684

685 **Supplementary table 1:** List of all genes mentioned in the text with their  
686 corresponding name as found in the transcriptome as well as the best BLASTx hit  
687 from Swissprot.

688

689 **Supplementary table 2:** List of the top 10 markers in each cluster and the  
690 corresponding gene name and BLASTx hit.

691

692 **Supplementary table 3:** List of all 978 BUSCOs used to assess our non-redundant  
693 transcriptome and the corresponding *Isodiametra pulchra* transcript if present.

694

695 **Supplementary table 4:** List of all uncharacterized *Isodiametra pulchra* genes with  
696 similar sequences in *Symsagittifera roscoffensis*.

697

698 **Supplementary table 5:** List of all uncharacterized *Isodiametra pulchra* genes with  
699 similar sequences in *Xenoturbella bocki*.

700

701

702 **Figure legends**

703

704 **Figure 1: Clustering of *Isodiametra pulchra* cells depicts a repertoire of 10 major**  
705 **cell type categories**

706 (A): UMAP of all cells showing the assignment of all 42 cell clusters to cell-type  
707 categories

708 (B): Heatmap showing cell-type specific markers for some of the cell categories

709 (C): Confocal image showing staining of nuclei in an *Isodiametra pulchra* hatchling  
710 and corresponding visualization of automated nuclei counting in a three  
711 dimensional reconstruction.

712

713

714 **Figure 2: Stem cells express piwi-like genes and conserved proliferation**  
715 **markers**

716 (A) Dotplot showing expression of Stem-cell and proliferation markers across all 42  
717 cell clusters.

718 (B) Feature plots showing the expression of PIWI-like 1 and PIWI-like 2 across all  
719 cells. Red dotted line highlights clusters 2 and 16.

720

721

722

723 **Figure 3: *Isodiametra* nervous system displays a high diversity of sensory cell**  
724 **types**

725 (A) UMAP showing neuronal sub-clusters and their assigned categories

726 (B) Dotplot showing the expression of main markers of each of the 12 clusters.  
727 Cluster numbers are colored according to their assigned categories.

728 (C) Featureplots showing the expression of different specific neuronal markers with  
729 corresponding images showing immunostaining with anti-serotonin antibody  
730 and smFISH against Amiloride-sensitive Na<sup>+</sup> channel 1 and TRP-C5. Scale  
731 bars = 25 μM.

732

733 **Figure 4: Digestion and nutrient transport can be shared within a single cell type**



734 (A) DotPlot showing the expression of specific markers for 9 identified as “digestive  
735 I”, “and “Digestive II”. Genes are sorted by functional categories.

736 (B) UMAP highlighting the cell types involved in digestion, nutrient transport or both  
737 (C) ISH showing the expression pattern of cathepsin B-2. Scale bar = 50µM.

738

### 739 **Figure 5: Acoel epithelial and secretory cells predict high functional diversity**

740 (A) Heatmap showing the expression level specific markers for the 15 cell clusters  
741 identified as “Epithelial I”, “Epithelial II” and “Secretory”. Rows represent genes  
742 and columns represent cells.

743 (B) UMAP highlighting the cell types presumed to be epithelial, motor ciliated and  
744 or secretory.

745 (C) Immunostainings using anti-acteylated tubulin antibodies and anti-dDelta  
746 antibodies that highlight the heavy ciliation of the animal and the outline of the  
747 *I. pulchra* epithelial cells respectively. Scale bars = 25µM

748 (D) Feature plots showing the expression of specific markers for secretory and  
749 epithelial cells across all cells and their corresponding smFISH images. Scale  
750 bar = 50µM.

751

752

### 753 **Figure 6: Muscle cells show high marker conservation with other bilaterians**

754 (A) DotPlot showing the expression of specific markers for muscle across all 42 cell  
755 clusters. Three likely candidates for muscle cells are highlighted.

756 (B) UMAP highlighting the three clusters identified as muscle cells.

757 (C) Phalloidin staining showing the actin filament network of *I. pulchra* and ISH for  
758 tropomyosin. Scale bars = 20µM.

759

### 760 **Supplementary figure 1 : Transcriptome annotation and comparisons**

761 (A) Photographs showing three representatives of Xenacoelomorpha: *Isodiametra*  
762 *pulchra*, *Symsagittifera roscoffensis* and *Xenoturbella bocki*. Their phylogenetic  
763 relationship is shown underneath and the number of identified clade-specific  
764 candidate transcripts with *I.pulchra* are shown above.

765 (B) Report of alignments of the non-redundant *Isodiametra pulchra* transcriptome  
766 to the Benchmark Universal Single-copy Orthologs (BUSCOs) of the metazoan  
767 dataset of 978 genes.

768 (C) Pie plots indicating the proportion of the transcriptome with either Protein  
769 domain homology or BLASTx-based homology in Swissprot database.

770

771

## 772 **Supplementary figure 2 : Quality controls and raw clusters**

773 (A) Violin plot showing the distribution of all cells based on their gene-per-cell  
774 counts.

775 (B) Violin plot showing the distribution of filtered cells based on their gene-per-  
776 cell counts. Only cells with 200 to 2000 genes are kept to improve overall cell  
777 quality homogeneity.

778 (C) Elbow plot showing the raking of principal components (PCs) based on their  
779 standard deviation. Red dotted line shows the upper limit of 25 PCs used for  
780 further analysis, corresponding to the elbow of the curve.

781 (D) UMAP of the raw 42 clusters obtained on Seurat by using 25 PCs and a  
782 resolution of 2.5.

783

## 784 **Supplementary figure 3 : TRP channels and Opsins**

785 (A) Dotplot showing the expression of all identified TRP channels across all  
786 clusters. Highlighted clusters are identified as TRP+ neurons.

787 (B) Dotplot showing the expression of all identified opsins across all clusters.  
788 Highlighted clusters are identified as TRP+ neurons.

789

790

## 791 **References**

792

793 Achatz, J. G., & Martinez, P. (2012). The nervous system of *Isodiametra pulchra*

794 (*Acoela*) with a discussion on the neuroanatomy of the Xenacoelomorpha and its  
795 evolutionary implications. *Frontiers in Zoology*, 9(1), 27.

796 <https://doi.org/10.1186/1742-9994-9-27>

797 Andrikou, C., Thiel, D., Ruiz-Santesteban, J. A., & Hejnol, A. (2019). Active mode of  
798 excretion across digestive tissues predates the origin of excretory organs. *PLoS*  
799 *Biology*, 17(7), e3000408. <https://doi.org/10.1371/journal.pbio.3000408>

- 800 Baguñà, J., Martinez, P., Paps, J., & Riutort, M. (2008). Back in time: a new  
801 systematic proposal for the Bilateria. *Philosophical Transactions of the Royal*  
802 *Society of London. Series B, Biological Sciences*, 363(1496), 1481–1491.  
803 <https://doi.org/10.1098/rstb.2007.2238>
- 804 Bailly, X., Laguerre, L., Correc, G., Dupont, S., Kurth, T., Pfannkuchen, A., Entzeroth,  
805 R., Probert, I., Vinogradov, S., Lechauve, C., Garet-Delmas, M.-J., Reichert, H.,  
806 & Hartenstein, V. (2014). The chimerical and multifaceted marine acoel  
807 *Symsagittifera roscoffensis*: from photosymbiosis to brain regeneration. *Frontiers*  
808 *in Microbiology*, 5, 498. <https://doi.org/10.3389/fmicb.2014.00498>
- 809 Bery, A., Cardona, A., Martinez, P., & Hartenstein, V. (2010a). Structure of the central  
810 nervous system of a juvenile acoel, *Symsagittifera roscoffensis*. *Development*  
811 *Genes and Evolution*, 220(3-4), 61–76. [https://doi.org/10.1007/s00427-010-0328-](https://doi.org/10.1007/s00427-010-0328-2)  
812 2
- 813 Bery, A., Cardona, A., Martinez, P., & Hartenstein, V. (2010b). Structure of the central  
814 nervous system of a juvenile acoel, *Symsagittifera roscoffensis*. *Development*  
815 *Genes and Evolution*, 220(3-4), 61–76. [https://doi.org/10.1007/s00427-010-0328-](https://doi.org/10.1007/s00427-010-0328-2)  
816 2
- 817 Blakely, R. D., Berson, H. E., Fremeau, R. T. J., Caron, M. G., Peek, M. M., Prince,  
818 H. K., & Bradley, C. C. (1991). Cloning and expression of a functional serotonin  
819 transporter from rat brain. *Nature*, 354(6348), 66–70.  
820 <https://doi.org/10.1038/354066a0>
- 821 Brauchi, S., Orta, G., Salazar, M., Rosenmann, E., & Latorre, R. (2006). A hot-  
822 sensing cold receptor: C-terminal domain determines thermosensation  
823 in transient receptor potential channels. *The Journal of Neuroscience: The*

- 824 *Official Journal of the Society for Neuroscience*, 26(18), 4835–4840.
- 825 <https://doi.org/10.1523/JNEUROSCI.5080-05.2006>
- 826 Bryant, D. M., Johnson, K., DiTommaso, T., Tickle, T., Couger, M. B., Payzin-Dogru,  
827 D., Lee, T. J., Leigh, N. D., Kuo, T.-H., Davis, F. G., Bateman, J., Bryant, S.,  
828 Guzikowski, A. R., Tsai, S. L., Coyne, S., Ye, W. W., Freeman, R. M. J., Peshkin,  
829 L., Tabin, C. J., ... Whited, J. L. (2017). A Tissue-Mapped Axolotl De Novo  
830 Transcriptome Enables Identification of Limb Regeneration Factors. *Cell Reports*,  
831 18(3), 762–776. <https://doi.org/10.1016/j.celrep.2016.12.063>
- 832 Butler, A., Hoffman, P., Smibert, P., Papalexi, E., & Satija, R. (2018). Integrating  
833 single-cell transcriptomic data across different conditions, technologies, and  
834 species. *Nature Biotechnology*, 36(5), 411–420. <https://doi.org/10.1038/nbt.4096>
- 835 Cannon, J. T., Vellutini, B. C., Smith, J. 3rd, Ronquist, F., Jondelius, U., & Hejnol, A.  
836 (2016). Xenacoelomorpha is the sister group to Nephrozoa. *Nature*, 530(7588),  
837 89–93. <https://doi.org/10.1038/nature16520>
- 838 Chang, A. S., Chang, S. M., Starnes, D. M., Schroeter, S., Bauman, A. L., & Blakely,  
839 R. D. (1996). Cloning and expression of the mouse serotonin transporter. *Brain*  
840 *Research. Molecular Brain Research*, 43(1-2), 185–192.  
841 [https://doi.org/10.1016/s0169-328x\(96\)00172-6](https://doi.org/10.1016/s0169-328x(96)00172-6)
- 842 Chiodin, M., Børve, A., Berezikov, E., Ladurner, P., Martinez, P., & Hejnol, A. (2013).  
843 Mesodermal gene expression in the acoel *Isodiametra pulchra* indicates a low  
844 number of mesodermal cell types and the endomesodermal origin of the gonads.  
845 *PloS One*, 8(2), e55499. <https://doi.org/10.1371/journal.pone.0055499>
- 846 Chiodin, M., Børve, A., Berezikov, E., Ladurner, P., Martinez, P., & Hejnol, A. (2013).  
847 Mesodermal gene expression in the acoel *Isodiametra pulchra* indicates a low

- 848 number of mesodermal cell types and the endomesodermal origin of the gonads.  
849 *PloS One*, 8(2), e55499. <https://doi.org/10.1371/journal.pone.0055499>
- 850 Corey, J. L., Quick, M. W., Davidson, N., Lester, H. A., & Guastella, J. (1994). A  
851 cocaine-sensitive *Drosophila* serotonin transporter: cloning, expression, and  
852 electrophysiological characterization. *Proceedings of the National Academy of*  
853 *Sciences of the United States of America*, 91(3), 1188–1192.  
854 <https://doi.org/10.1073/pnas.91.3.1188>
- 855 De Mulder, K., Kualess, G., Pfister, D., Willems, M., Egger, B., Salvenmoser, W.,  
856 Thaler, M., Gorny, A.-K., Hroudá, M., Borgonie, G., & Ladurner, P. (2009).  
857 Characterization of the stem cell system of the acoel *Isodiametra pulchra*. *BMC*  
858 *Developmental Biology*, 9, 69. <https://doi.org/10.1186/1471-213X-9-69>
- 859 Dittmann, I. L., Zauchner, T., Nevard, L. M., Telford, M. J., & Egger, B. (2018).  
860 SALMFamide2 and serotonin immunoreactivity in the nervous system of some  
861 acoels (Xenacoelomorpha). *Journal of Morphology*, 279(5), 589–597.  
862 <https://doi.org/10.1002/jmor.20794>
- 863 Dupont, S., Moya, A., & Bailly, X. (2012). Stable photosymbiotic relationship under  
864 CO<sub>2</sub>-induced acidification in the acoel worm *Symsagittifera roscoffensis*. *PloS*  
865 *One*, 7(1), e29568. <https://doi.org/10.1371/journal.pone.0029568>
- 866 Fincher, C. T., Wurtzel, O., de Hoog, T., Kravarik, K. M., & Reddien, P. W. (2018).  
867 Cell type transcriptome atlas for the planarian *Schmidtea mediterranea*. *Science*  
868 *(New York, N.Y.)*, 360(6391). <https://doi.org/10.1126/science.aaq1736>
- 869 Gavilán, B., Perea-Atienza, E., & Martínez, P. (2016). Xenacoelomorpha: a case of  
870 independent nervous system centralization? *Philosophical Transactions of the*  
871 *Royal Society of London. Series B, Biological Sciences*, 371(1685), 20150039.  
872 <https://doi.org/10.1098/rstb.2015.0039>

- 873 Gazizova, G., Zabotin, Y., & Golubev, A. I. (2017). Comparative morphology of  
874 parenchymal cells in Acoelomorpha and Plathelminthes. *Invertebrate Zoology*,  
875 14, 21–26. <https://doi.org/10.15298/invertzool.14.1.04>
- 876 Gehrke, A. R., Neverett, E., Luo, Y.-J., Brandt, A., Ricci, L., Hulett, R. E., Gompers,  
877 A., Ruby, J. G., Rokhsar, D. S., Reddien, P. W., & Srivastava, M. (2019). Acoel  
878 genome reveals the regulatory landscape of whole-body regeneration. *Science*  
879 (*New York, N.Y.*), 363(6432). <https://doi.org/10.1126/science.aau6173>
- 880 Guijarro-Clarke, C., Holland, P. W. H., & Paps, J. (2020). Widespread patterns of  
881 gene loss in the evolution of the animal kingdom. *Nature Ecology & Evolution*,  
882 4(4), 519–523. <https://doi.org/10.1038/s41559-020-1129-2>
- 883 Hejnal, A., & Martindale, M. Q. (2008a). Acoel development supports a simple  
884 planula-like urbilaterian. *Philosophical Transactions of the Royal Society of*  
885 *London. Series B, Biological Sciences*, 363(1496), 1493–1501.  
886 <https://doi.org/10.1098/rstb.2007.2239>
- 887 Hejnal, A., & Martindale, M. Q. (2008b). Acoel development indicates the independent  
888 evolution of the bilaterian mouth and anus. *Nature*, 456(7220), 382–386.  
889 <https://doi.org/10.1038/nature07309>
- 890 Hejnal, A., & Martindale, M. Q. (2008c). Acoel development indicates the independent  
891 evolution of the bilaterian mouth and anus. *Nature*, 456(7220), 382–386.  
892 <https://doi.org/10.1038/nature07309>
- 893 Hejnal, A., & Martindale, M. Q. (2009). Coordinated spatial and temporal expression  
894 of Hox genes during embryogenesis in the acoel *Convolutriloba longifissura*.  
895 *BMC Biology*, 7, 65. <https://doi.org/10.1186/1741-7007-7-65>

- 896 Inoue, K., & Odo, S. (1994). The adhesive protein cDNA of *Mytilus galloprovincialis*  
897 encodes decapeptide repeats but no hexapeptide motif. *The Biological Bulletin*,  
898 186(3), 349–355. <https://doi.org/10.2307/1542281>
- 899 Jondelius, U., Wallberg, A., Hooge, M., & Raikova, O. I. (2011). How the worm got its  
900 pharynx: phylogeny, classification and Bayesian assessment of character  
901 evolution in Acoela. *Systematic Biology*, 60(6), 845–871.  
902 <https://doi.org/10.1093/sysbio/syr073>
- 903 Julian P. S. Smith III, & Bush, L. (1991). *Convoluta pulchra* n. sp. (Turbellaria: Acoela)  
904 from the East Coast of North America. *Transactions of the American*  
905 *Microscopical Society*, 110(1), 12–26. JSTOR. <https://doi.org/10.2307/3226735>
- 906 Kapli, P., Yang, Z., & Telford, M. J. (2020). Phylogenetic tree building in the genomic  
907 age. *Nature Reviews. Genetics*. <https://doi.org/10.1038/s41576-020-0233-0>
- 908 Kim, A.-R., Rylett, R. J., & Shilton, B. H. (2006). Substrate binding and catalytic  
909 mechanism of human choline acetyltransferase. *Biochemistry*, 45(49), 14621–  
910 14631. <https://doi.org/10.1021/bi061536l>
- 911 Klauser, M. D. (1986). Mucous secretions of the acoel turbellarian *Convoluta* sp.  
912 Ørsted: An ecological and functional approach. *Journal of Experimental Marine*  
913 *Biology and Ecology*, 97(2), 123–133. <https://doi.org/10.1016/0022->  
914 0981(86)90114-0
- 915 Kozma, M. T., Schmidt, M., Ngo-Vu, H., Sparks, S. D., Senatore, A., & Derby, C. D.  
916 (2018). Chemoreceptor proteins in the Caribbean spiny lobster, *Panulirus argus*:  
917 Expression of Ionotropic Receptors, Gustatory Receptors, and TRP channels in  
918 two chemosensory organs and brain. *PloS One*, 13(9), e0203935.  
919 <https://doi.org/10.1371/journal.pone.0203935>

- 920 Ladurner, P., & Rieger, R. (2000). Embryonic muscle development of *Convoluta*  
921 *pulchra* (Turbellaria-acoelomorpha, platyhelminthes). *Developmental Biology*,  
922 222(2), 359–375. <https://doi.org/10.1006/dbio.2000.9715>
- 923 Marin, F., Luquet, G., Marie, B., & Medakovic, D. (2008). Molluscan shell proteins:  
924 primary structure, origin, and evolution. *Current Topics in Developmental Biology*,  
925 80, 209–276. [https://doi.org/10.1016/S0070-2153\(07\)80006-8](https://doi.org/10.1016/S0070-2153(07)80006-8)
- 926 Martindale, M. Q., & Hejzol, A. (2009). A developmental perspective: changes in the  
927 position of the blastopore during bilaterian evolution. *Developmental Cell*, 17(2),  
928 162–174. <https://doi.org/10.1016/j.devcel.2009.07.024>
- 929 Martínez, P., Hartenstein, V., & Sprecher, S. (2017). *Subject: Invertebrate*  
930 *Neuroscience Online Xenacoelomorpha Nervous Systems Summary and*  
931 *Keywords.*
- 932 Martin, G. G. (1978). A new function of rhabdites: Mucus production for ciliary gliding.  
933 *Zoomorphologie*, 91(3), 235–248. <https://doi.org/10.1007/BF00999813>
- 934 Montell, C., & Rubin, G. M. (1989). Molecular characterization of the *Drosophila* *trp*  
935 locus: a putative integral membrane protein required for phototransduction.  
936 *Neuron*, 2(4), 1313–1323. [https://doi.org/10.1016/0896-6273\(89\)90069-x](https://doi.org/10.1016/0896-6273(89)90069-x)
- 937 Moreno, E., De Mulder, K., Salvenmoser, W., Ladurner, P., & Martínez, P. (2010).  
938 Inferring the ancestral function of the posterior Hox gene within the  
939 bilateria: controlling the maintenance of reproductive structures, the musculature  
940 and the nervous system in the acoel flatworm *Isodiametra pulchra*. *Evolution &*  
941 *Development*, 12(3), 258–266. <https://doi.org/10.1111/j.1525-142X.2010.00411.x>
- 942 Moreno, E., Nadal, M., Baguna, J., & Martinez, P. (2009). Tracking the origins of the  
943 bilaterian Hox patterning system: insights from the acoel flatworm *Symsagittifera*



- 944        roscoffensis. *Evolution & Development*, 11(5), 574–581.
- 945        <https://doi.org/10.1111/j.1525-142X.2009.00363.x>
- 946 Nakano, H., Lundin, K., Bourlat, S. J., Telford, M. J., Funch, P., Nyengaard, J. R.,  
947        Obst, M., & Thorndyke, M. C. (2013). Xenoturbella bocki exhibits direct  
948        development with similarities to Acoelomorpha. *Nature Communications*, 4,  
949        1537. <https://doi.org/10.1038/ncomms2556>
- 950 Nissen, M., Shcherbakov, D., Heyer, A., Brummer, F., & Schill, R. O. (2015).  
951        Behaviour of the plathelminth Symsagittifera roscoffensis under different light  
952        conditions and the consequences for the symbiotic algae Tetraselmis convolutae.  
953        *The Journal of Experimental Biology*, 218(Pt 11), 1693–1698.  
954        <https://doi.org/10.1242/jeb.110429>
- 955 Orjalo, A. V. J., & Johansson, H. E. (2016). Stellaris(R) RNA Fluorescence In Situ  
956        Hybridization for the Simultaneous Detection of Immature and Mature Long  
957        Noncoding RNAs in Adherent Cells. *Methods in Molecular Biology (Clifton,*  
958        *N.J.)*, 1402, 119–134. [https://doi.org/10.1007/978-1-4939-3378-5\\_10](https://doi.org/10.1007/978-1-4939-3378-5_10)
- 959 Paps, J., & Holland, P. W. H. (2018). Reconstruction of the ancestral metazoan  
960        genome reveals an increase in genomic novelty. *Nature Communications*, 9(1),  
961        1730. <https://doi.org/10.1038/s41467-018-04136-5>
- 962 Pedersen, K. J. (1965). Cytological and cytochemical observations on the mucous  
963        gland cells of an acoel turbellarian, *Convoluta convoluta*. *Annals of the New York*  
964        *Academy of Sciences*, 118(24), 930–965. [https://doi.org/10.1111/j.1749-](https://doi.org/10.1111/j.1749-6632.1965.tb40162.x)  
965        [6632.1965.tb40162.x](https://doi.org/10.1111/j.1749-6632.1965.tb40162.x)
- 966 Peng, G., Shi, X., & Kadowaki, T. (2015). Evolution of TRP channels inferred by their  
967        classification in diverse animal species. *Molecular Phylogenetics and Evolution*,  
968        84, 145–157. <https://doi.org/10.1016/j.ympev.2014.06.016>

- 969 Perea-Atienza, E., Botta, M., Salvenmoser, W., Gschwentner, R., Egger, B., Kristof,  
970 A., Martinez, P., & Achatz, J. G. (2013). Posterior regeneration in *Isodiametra*  
971 *pulchra* (Acoela, Acoelomorpha). *Frontiers in Zoology*, *10*(1), 64.  
972 <https://doi.org/10.1186/1742-9994-10-64>
- 973 Perea-Atienza, E., Sprecher, S. G., & Martinez, P. (2018). Characterization of the  
974 bHLH family of transcriptional regulators in the acoel *S. roscoffensis* and their  
975 putative role in neurogenesis. *EvoDevo*, *9*, 8. [https://doi.org/10.1186/s13227-](https://doi.org/10.1186/s13227-018-0097-y)  
976 [018-0097-y](https://doi.org/10.1186/s13227-018-0097-y)
- 977 Philippe, H., Brinkmann, H., Copley, R. R., Moroz, L. L., Nakano, H., Poustka, A. J.,  
978 Wallberg, A., Peterson, K. J., & Telford, M. J. (2011). Acoelomorph flatworms are  
979 deuterostomes related to *Xenoturbella*. *Nature*, *470*(7333), 255–258.  
980 <https://doi.org/10.1038/nature09676>
- 981 Philippe, H., Poustka, A. J., Chiodin, M., Hoff, K. J., Dessimoz, C., Tomiczek, B.,  
982 Schiffer, P. H., Muller, S., Domman, D., Horn, M., Kuhl, H., Timmermann, B.,  
983 Satoh, N., Hikosaka-Katayama, T., Nakano, H., Rowe, M. L., Elphick, M. R.,  
984 Thomas-Chollier, M., Hankeln, T., ... Telford, M. J. (2019). Mitigating Anticipated  
985 Effects of Systematic Errors Supports Sister-Group Relationship between  
986 Xenacoelomorpha and Ambulacraria. *Current Biology : CB*, *29*(11), 1818–  
987 1826.e6. <https://doi.org/10.1016/j.cub.2019.04.009>
- 988 Plass, M., Solana, J., Wolf, F. A., Ayoub, S., Misios, A., Glažar, P., Obermayer, B.,  
989 Theis, F. J., Kocks, C., & Rajewsky, N. (2018). Cell type atlas and lineage tree of  
990 a whole complex animal by single-cell transcriptomics. *Science (New York,*  
991 *N. Y.)*, *360*(6391). <https://doi.org/10.1126/science.aag1723>
- 992 Raikova, O. I., Reuter, M., Jondelius, U., & Gustafsson, M. K. S. (2000a). An  
993 immunocytochemical and ultrastructural study of the nervous and muscular

- 994 systems of *Xenoturbella westbladi* (Bilateria inc. sed.). *Zoomorphology*, 120(2),  
995 107–118. <https://doi.org/10.1007/s004350000028>
- 996 Raikova, O. I., Reuter, M., Jondelius, U., & Gustafsson, M. K. S. (2000b). An  
997 immunocytochemical and ultrastructural study of the nervous and muscular  
998 systems of *Xenoturbella westbladi* (Bilateria inc. sed.). *Zoomorphology*, 120(2),  
999 107–118. <https://doi.org/10.1007/s004350000028>
- 1000 Raz, A. A., Srivastava, M., Salvamoser, R., & Reddien, P. W. (2017). Acoel  
1001 regeneration mechanisms indicate an ancient role for muscle in regenerative  
1002 patterning. *Nature Communications*, 8(1), 1260. [https://doi.org/10.1038/s41467-](https://doi.org/10.1038/s41467-017-01148-5)  
1003 017-01148-5
- 1004 Rieger, R. M., & Ladurner, P. (2003). The significance of muscle cells for the origin of  
1005 mesoderm in bilateria. *Integrative and Comparative Biology*, 43(1), 47–54.  
1006 <https://doi.org/10.1093/icb/43.1.47>
- 1007 Robertson, H. E., Lapraz, F., Egger, B., Telford, M. J., & Schiffer, P. H. (2017). The  
1008 mitochondrial genomes of the acoelomorph worms *Paratomella rubra*,  
1009 *Isodiametra pulchra* and *Archaphanostoma ylvae*. *Scientific Reports*, 7(1), 1847.  
1010 <https://doi.org/10.1038/s41598-017-01608-4>
- 1011 Ruiz-Trillo, I., Riutort, M., Littlewood, D. T., Herniou, E. A., & Baguña, J. (1999). Acoel  
1012 flatworms: earliest extant bilaterian Metazoans, not members of Platyhelminthes.  
1013 *Science (New York, N.Y.)*, 283(5409), 1919–1923.  
1014 <https://doi.org/10.1126/science.283.5409.1919>
- 1015 Satija, R., Farrell, J. A., Gennert, D., Schier, A. F., & Regev, A. (2015). Spatial  
1016 reconstruction of single-cell gene expression data. *Nature Biotechnology*, 33(5),  
1017 495–502. <https://doi.org/10.1038/nbt.3192>

- 1018 Sebe-Pedros, A., Chomsky, E., Pang, K., Lara-Astiaso, D., Gaiti, F., Mukamel, Z.,  
1019 Amit, I., Hejnal, A., Degnan, B. M., & Tanay, A. (2018). Early metazoan cell type  
1020 diversity and the evolution of multicellular gene regulation. *Nature Ecology &*  
1021 *Evolution*, 2(7), 1176–1188. <https://doi.org/10.1038/s41559-018-0575-6>
- 1022 Sebe-Pedros, A., Saudemont, B., Chomsky, E., Plessier, F., Mailhe, M.-P., Renno, J.,  
1023 Loe-Mie, Y., Lifshitz, A., Mukamel, Z., Schmutz, S., Novault, S., Steinmetz, P. R.  
1024 H., Spitz, F., Tanay, A., & Marlow, H. (2018). Cnidarian Cell Type Diversity and  
1025 Regulation Revealed by Whole-Organism Single-Cell RNA-Seq. *Cell*, 173(6),  
1026 1520–1534.e20. <https://doi.org/10.1016/j.cell.2018.05.019>
- 1027 Semmler, H., Chiodin, M., Bailly, X., Martinez, P., & Wanninger, A. (2010). Steps  
1028 towards a centralized nervous system in basal bilaterians: insights from  
1029 neurogenesis of the acoel Symsagittifera roscoffensis. *Development, Growth &*  
1030 *Differentiation*, 52(8), 701–713. <https://doi.org/10.1111/j.1440->  
1031 [169X.2010.01207.x](https://doi.org/10.1111/j.1440-169X.2010.01207.x)
- 1032 Slemmon, J. R., Campbell, G. A., Selski, D. J., & Bramson, H. N. (1991). The amino  
1033 terminus of the putative Drosophila choline acetyltransferase precursor is  
1034 cleaved to yield the 67 kDa enzyme. *Brain Research. Molecular Brain Research*,  
1035 9(3), 245–252. [https://doi.org/10.1016/0169-328x\(91\)90008-I](https://doi.org/10.1016/0169-328x(91)90008-I)
- 1036 Sprecher, S. G., Bernardo-Garcia, F. J., van Giesen, L., Hartenstein, V., Reichert, H.,  
1037 Neves, R., Bailly, X., Martinez, P., & Brauchle, M. (2015). Functional brain  
1038 regeneration in the acoel worm Symsagittifera roscoffensis. *Biology Open*, 4(12),  
1039 1688–1695. <https://doi.org/10.1242/bio.014266>
- 1040 Srivastava, M., Mazza-Curll, K. L., van Wolfswinkel, J. C., & Reddien, P. W. (2014).  
1041 Whole-body acoel regeneration is controlled by Wnt and Bmp-Admp signaling.

- 1042        *Current Biology : CB*, 24(10), 1107–1113.
- 1043        <https://doi.org/10.1016/j.cub.2014.03.042>
- 1044    Swapna, L. S., Molinaro, A. M., Lindsay-Mosher, N., Pearson, B. J., & Parkinson, J.
- 1045        (2018). Comparative transcriptomic analyses and single-cell RNA sequencing of
- 1046        the freshwater planarian *Schmidtea mediterranea* identify major cell types and
- 1047        pathway conservation. *Genome Biology*, 19(1), 124.
- 1048        <https://doi.org/10.1186/s13059-018-1498-x>
- 1049    Tyler, S. (1976). Comparative ultrastructure of adhesive systems in the turbellaria.
- 1050        *Zoomorphologie*, 84(1), 1–76. <https://doi.org/10.1007/BF02568557>
- 1051
- 1052

A

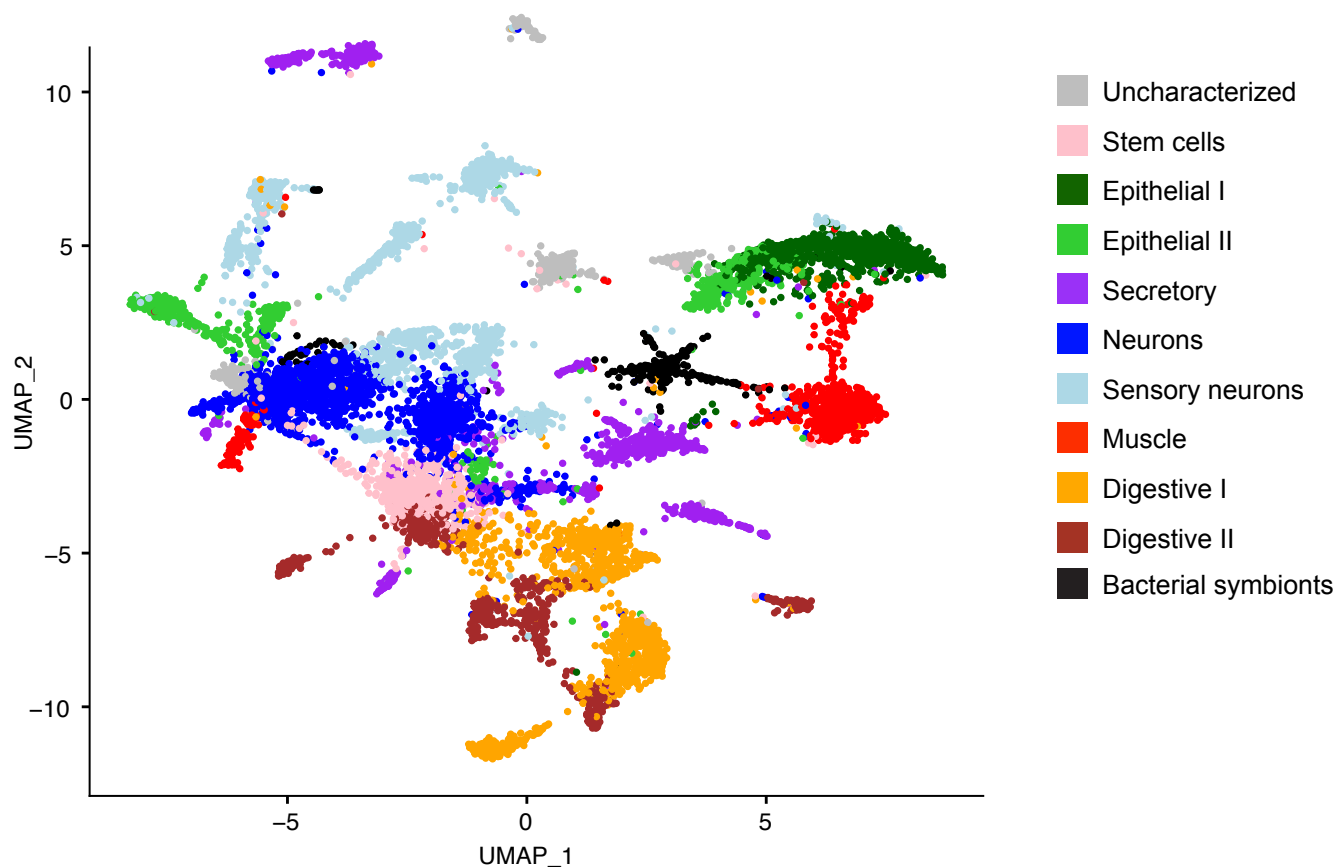

B

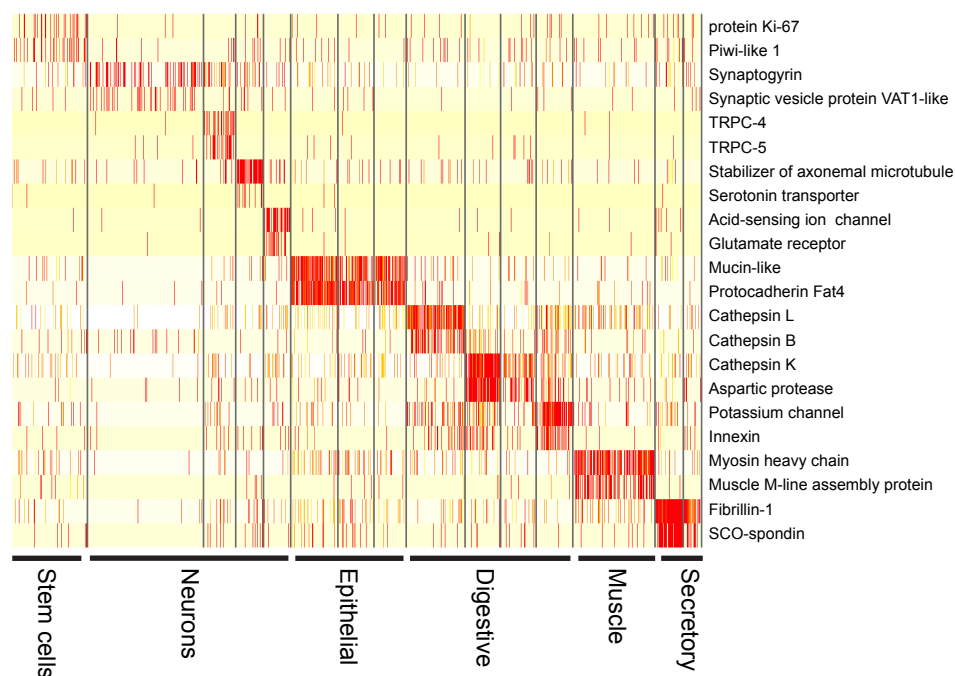

C

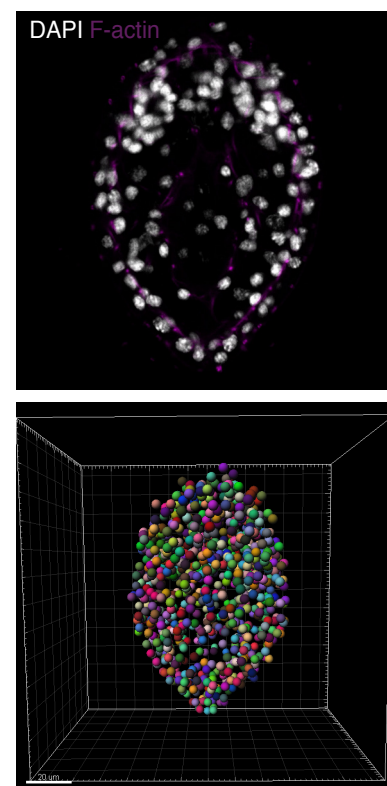

A

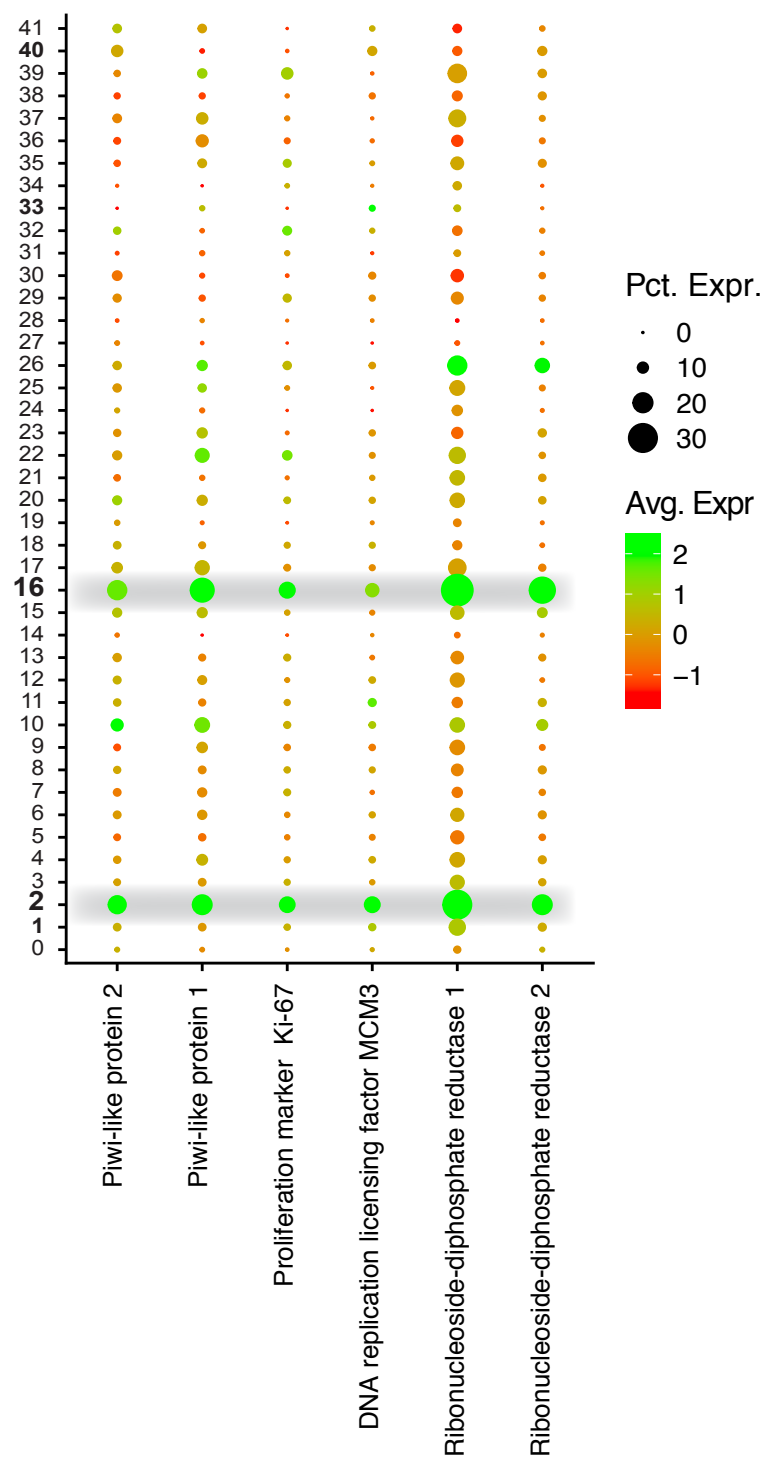

B

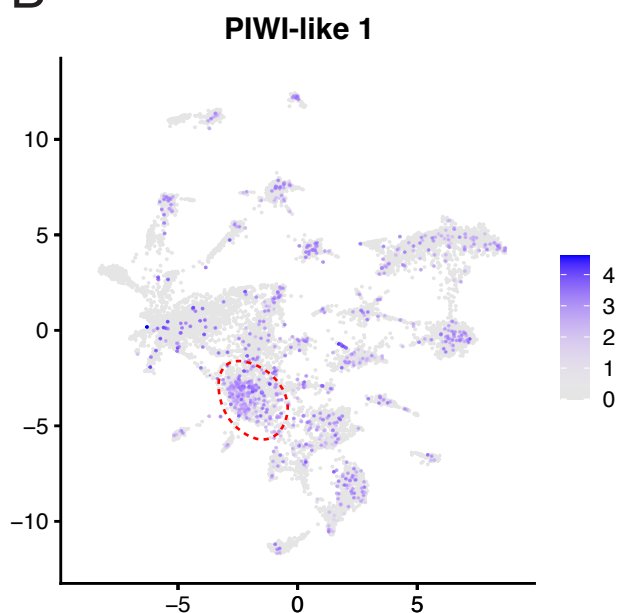

B'

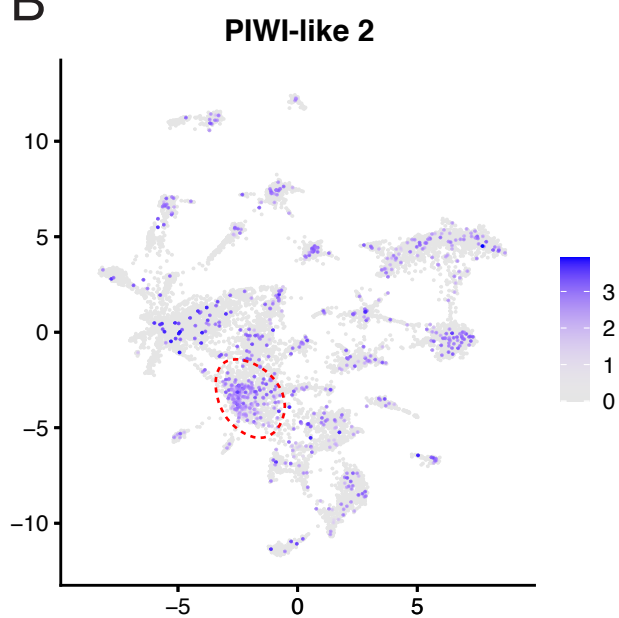

A

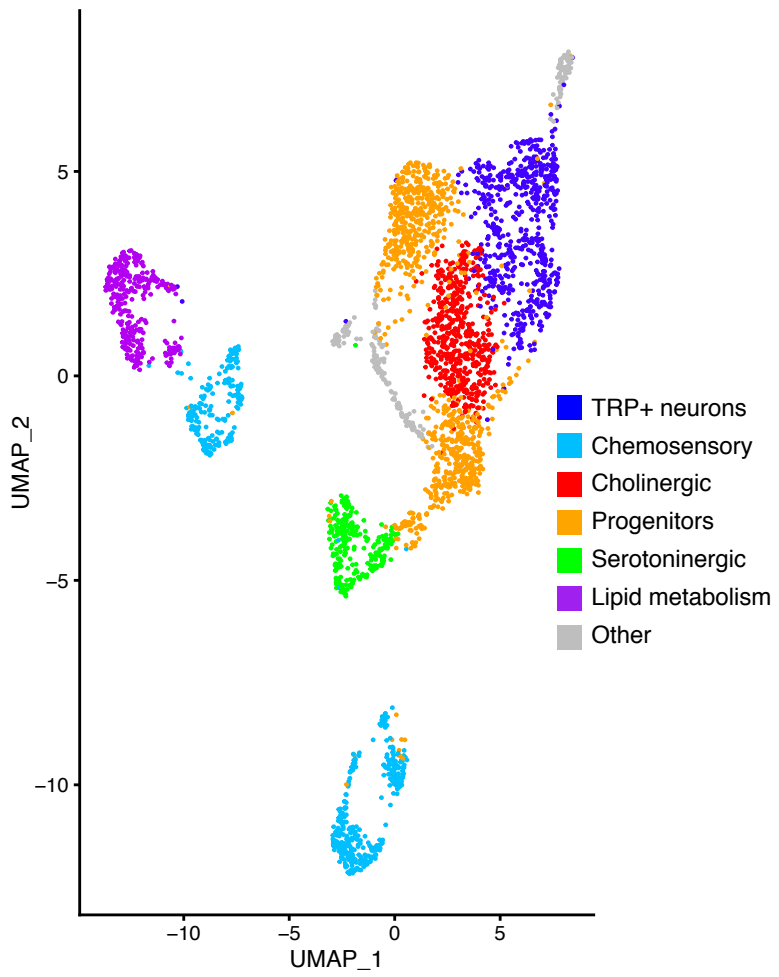

B

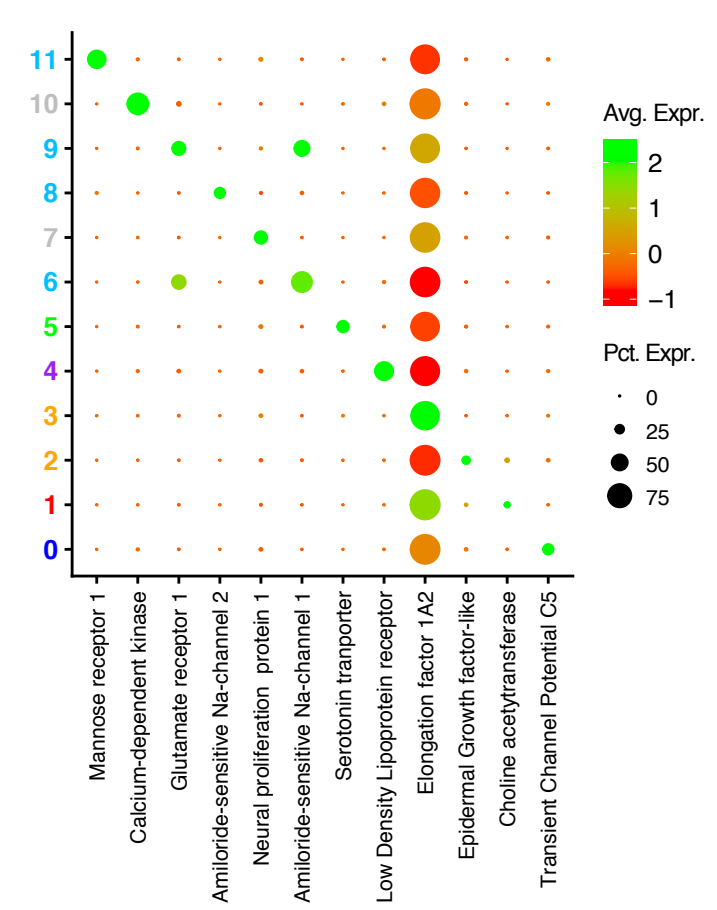

C

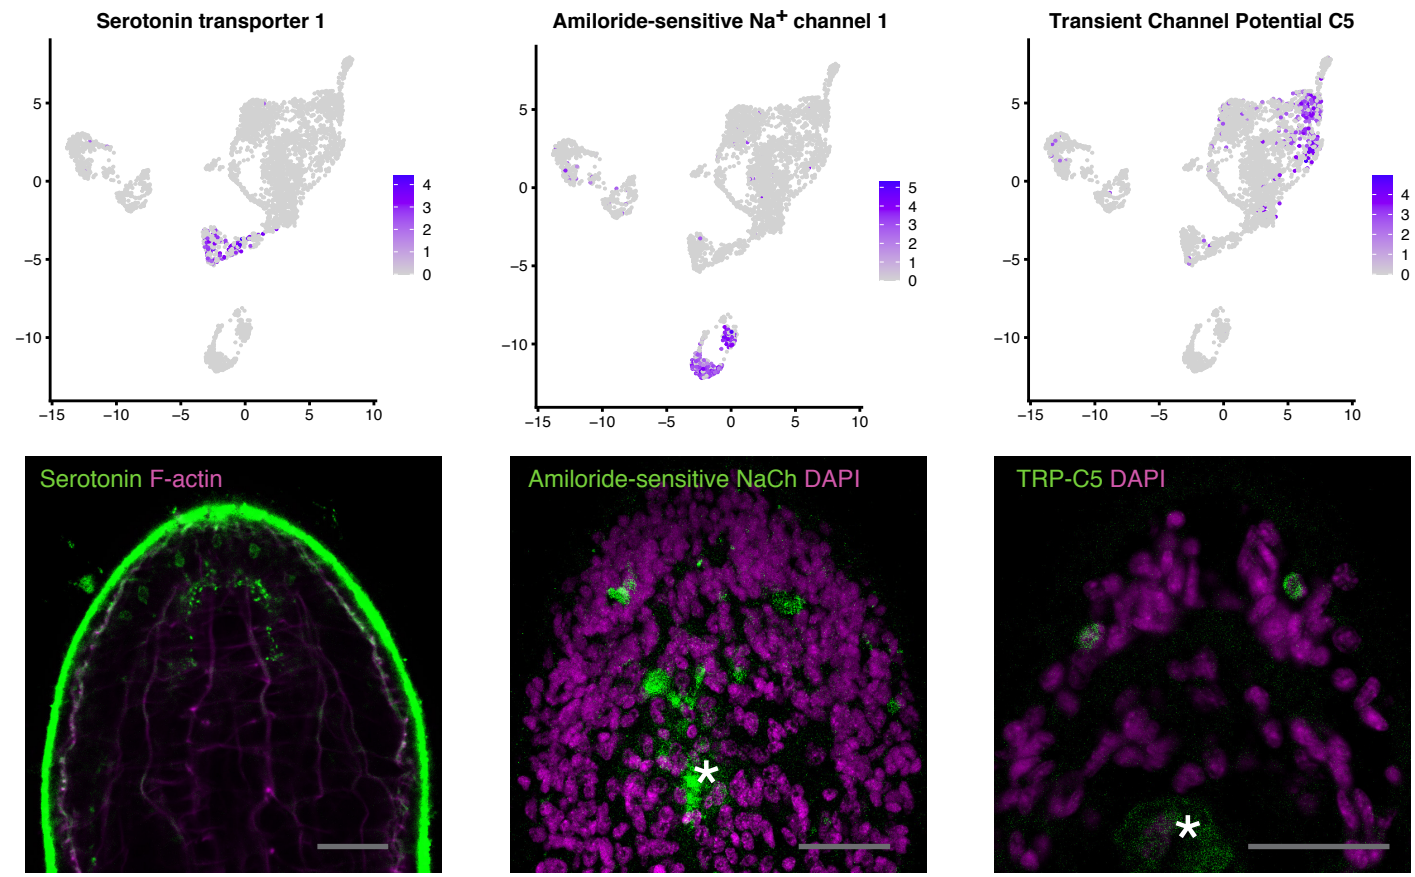



A

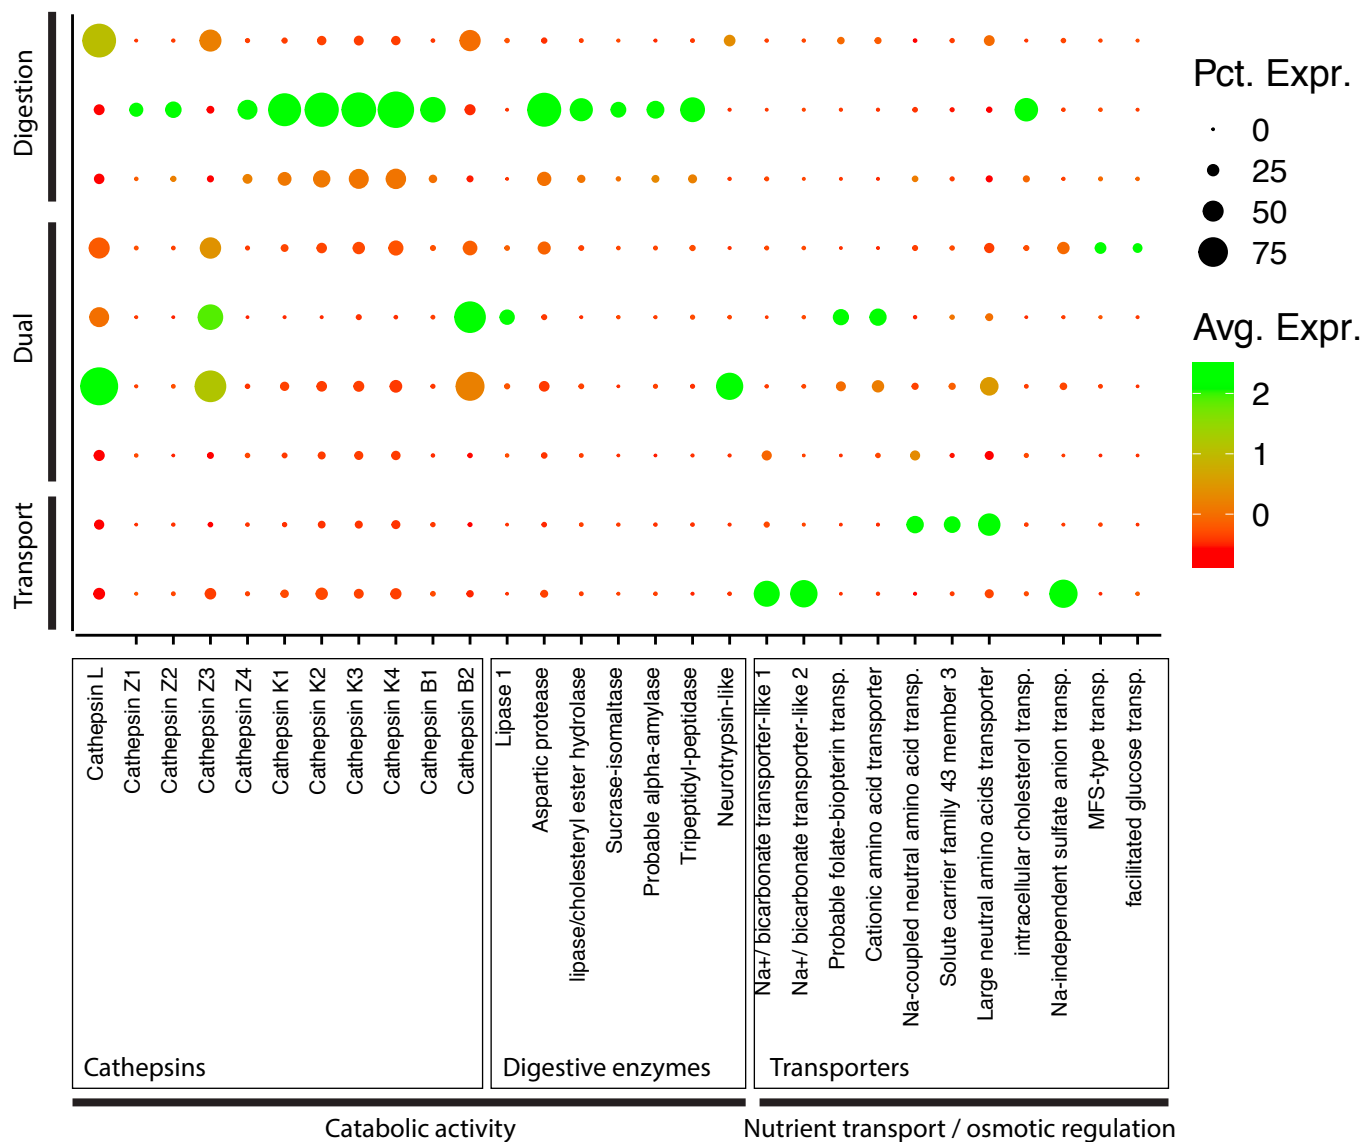

B

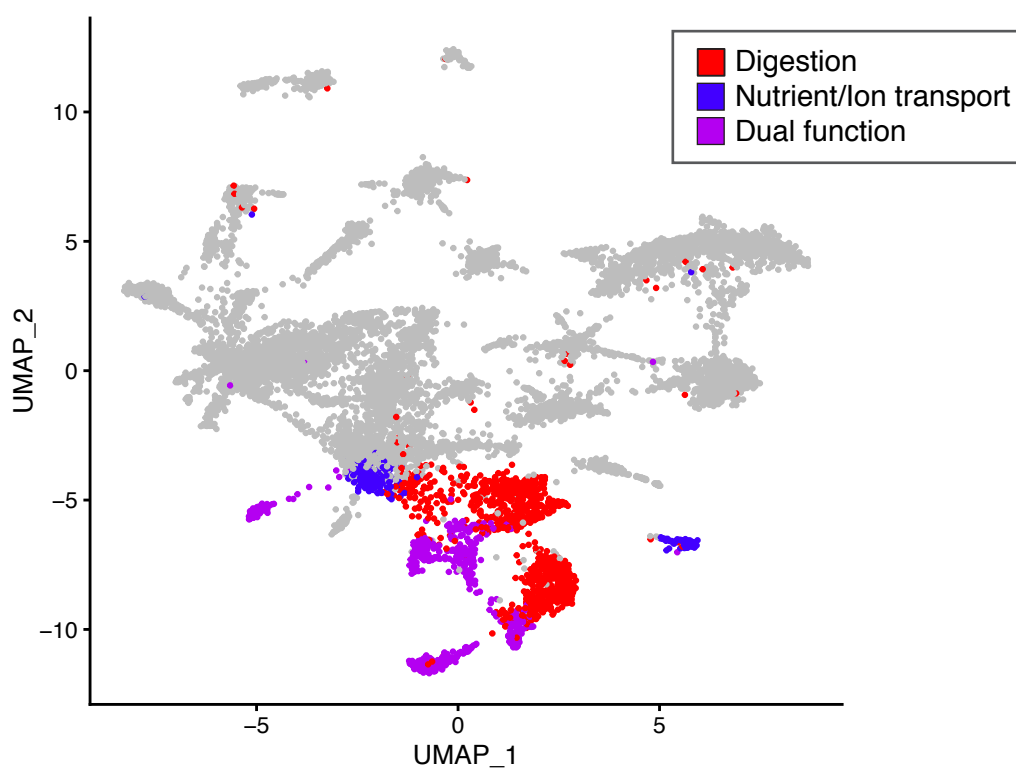

C

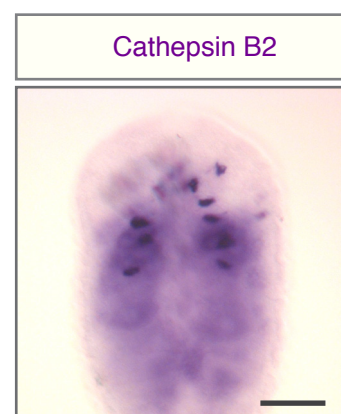

**A**

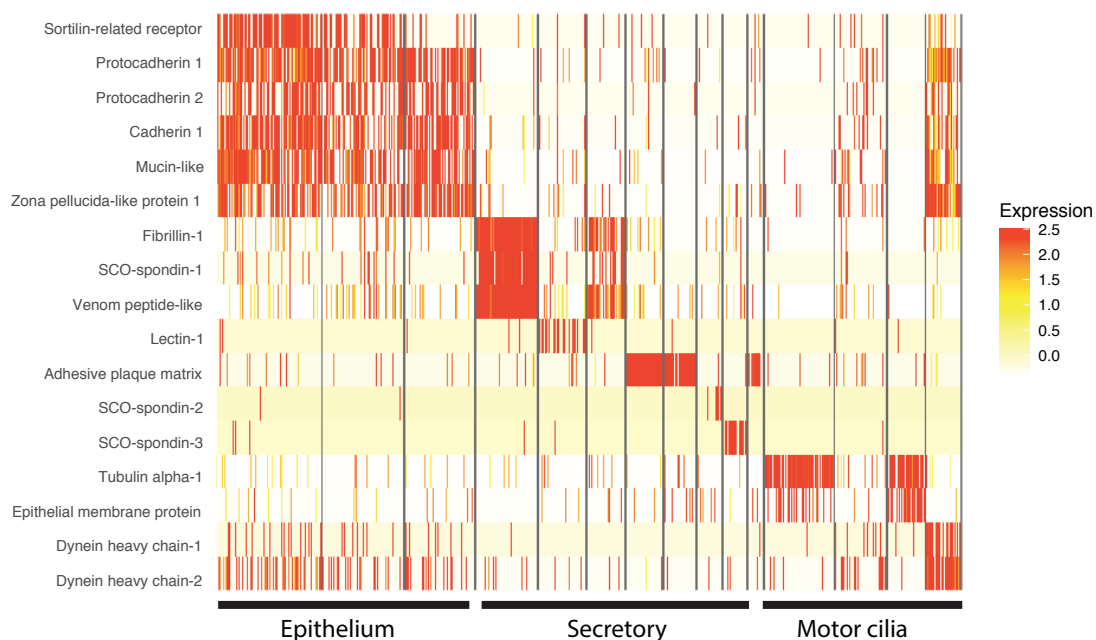

**B**

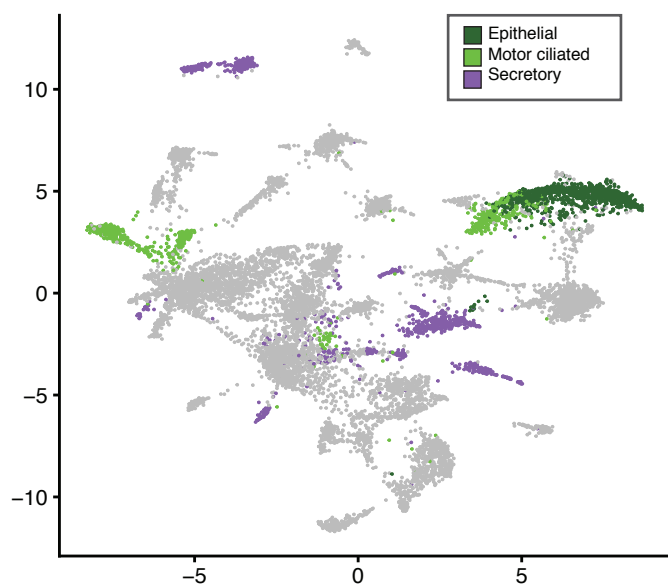

**C**

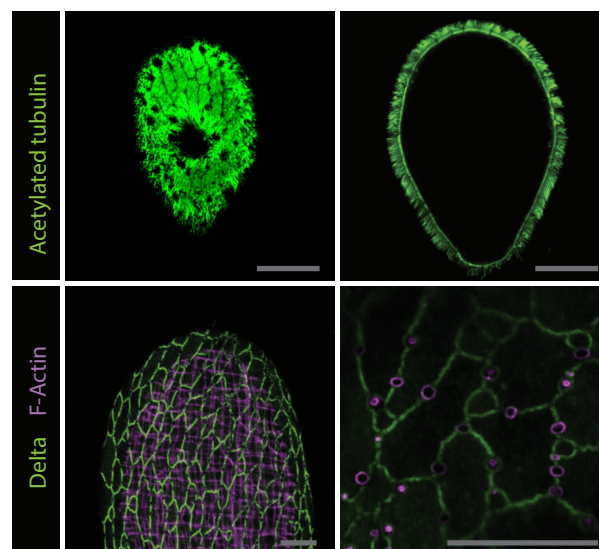

**D**

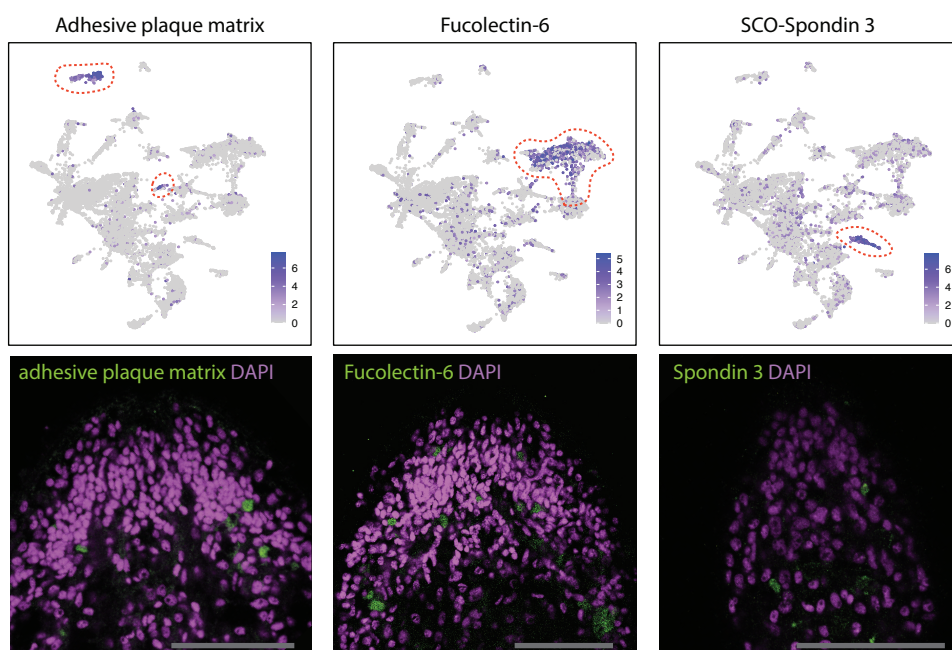

A

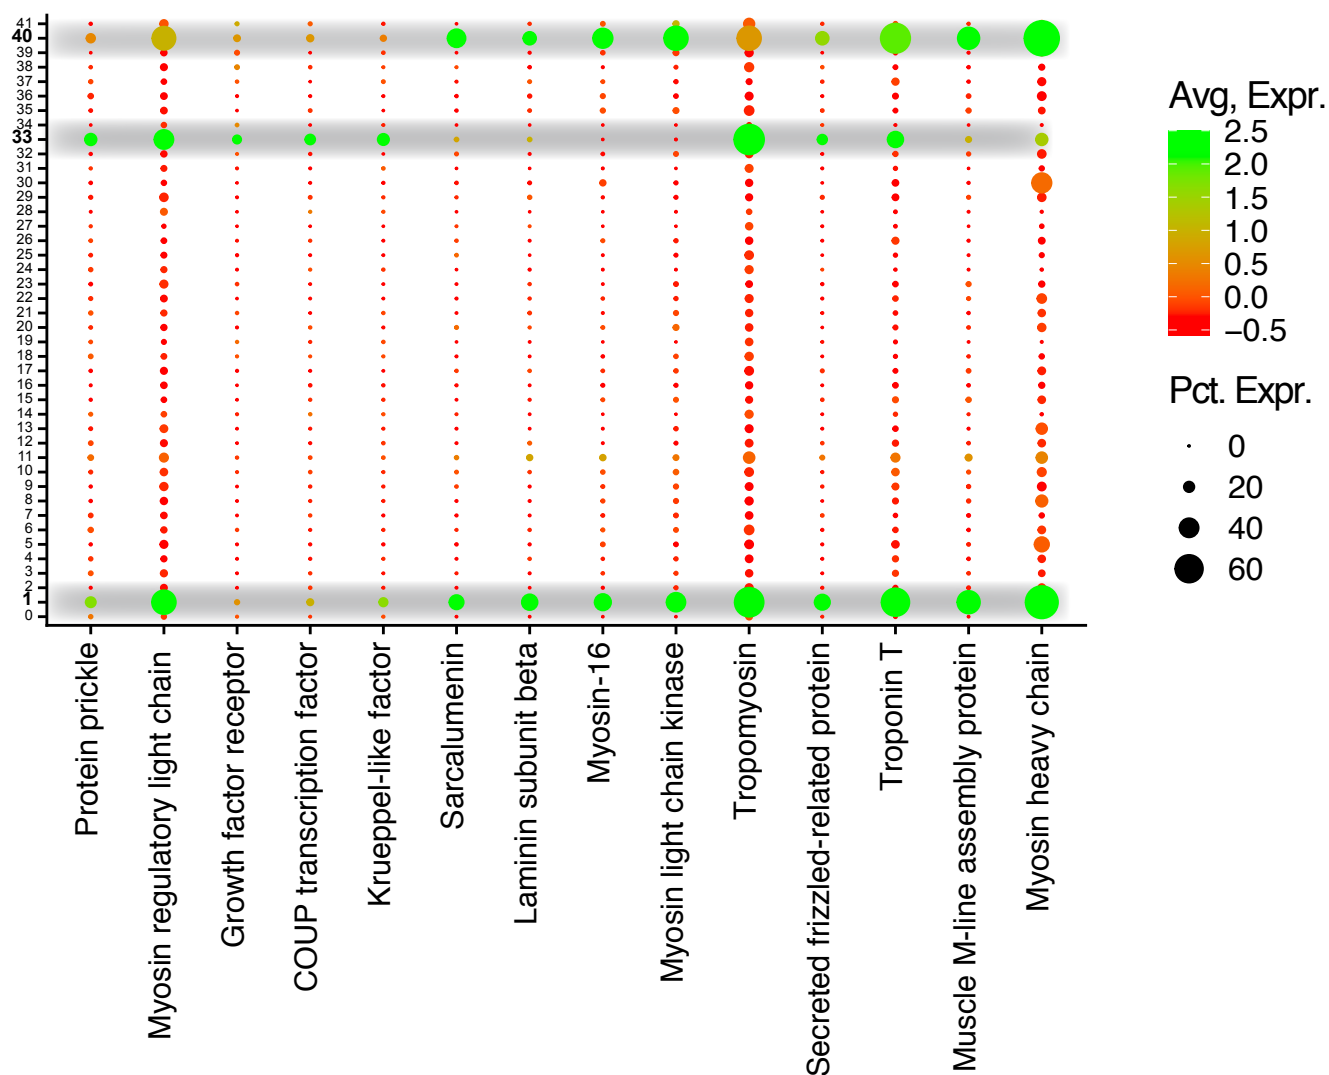

B

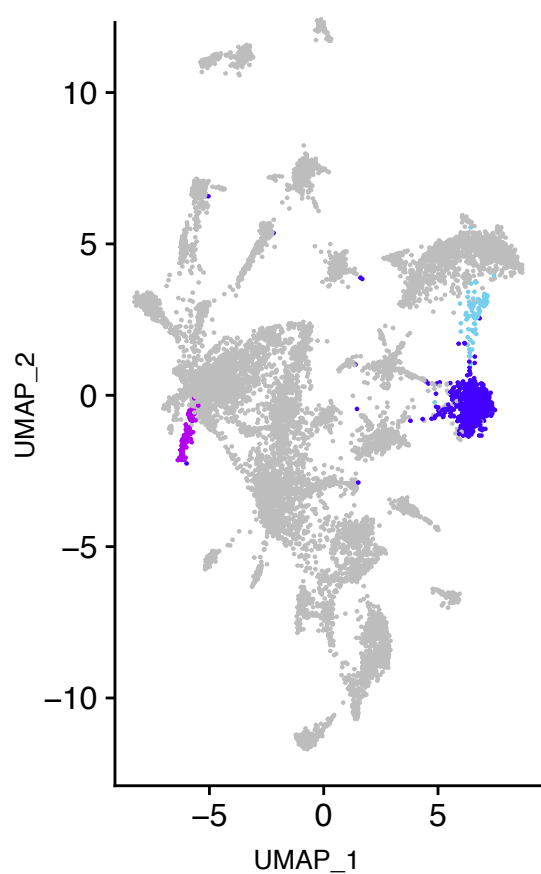

C

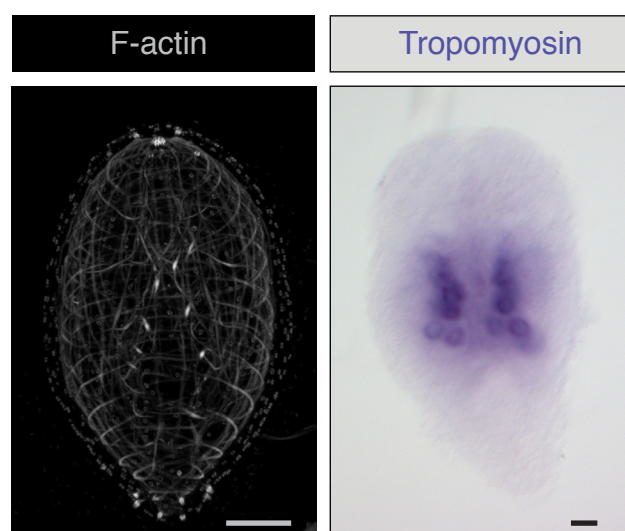

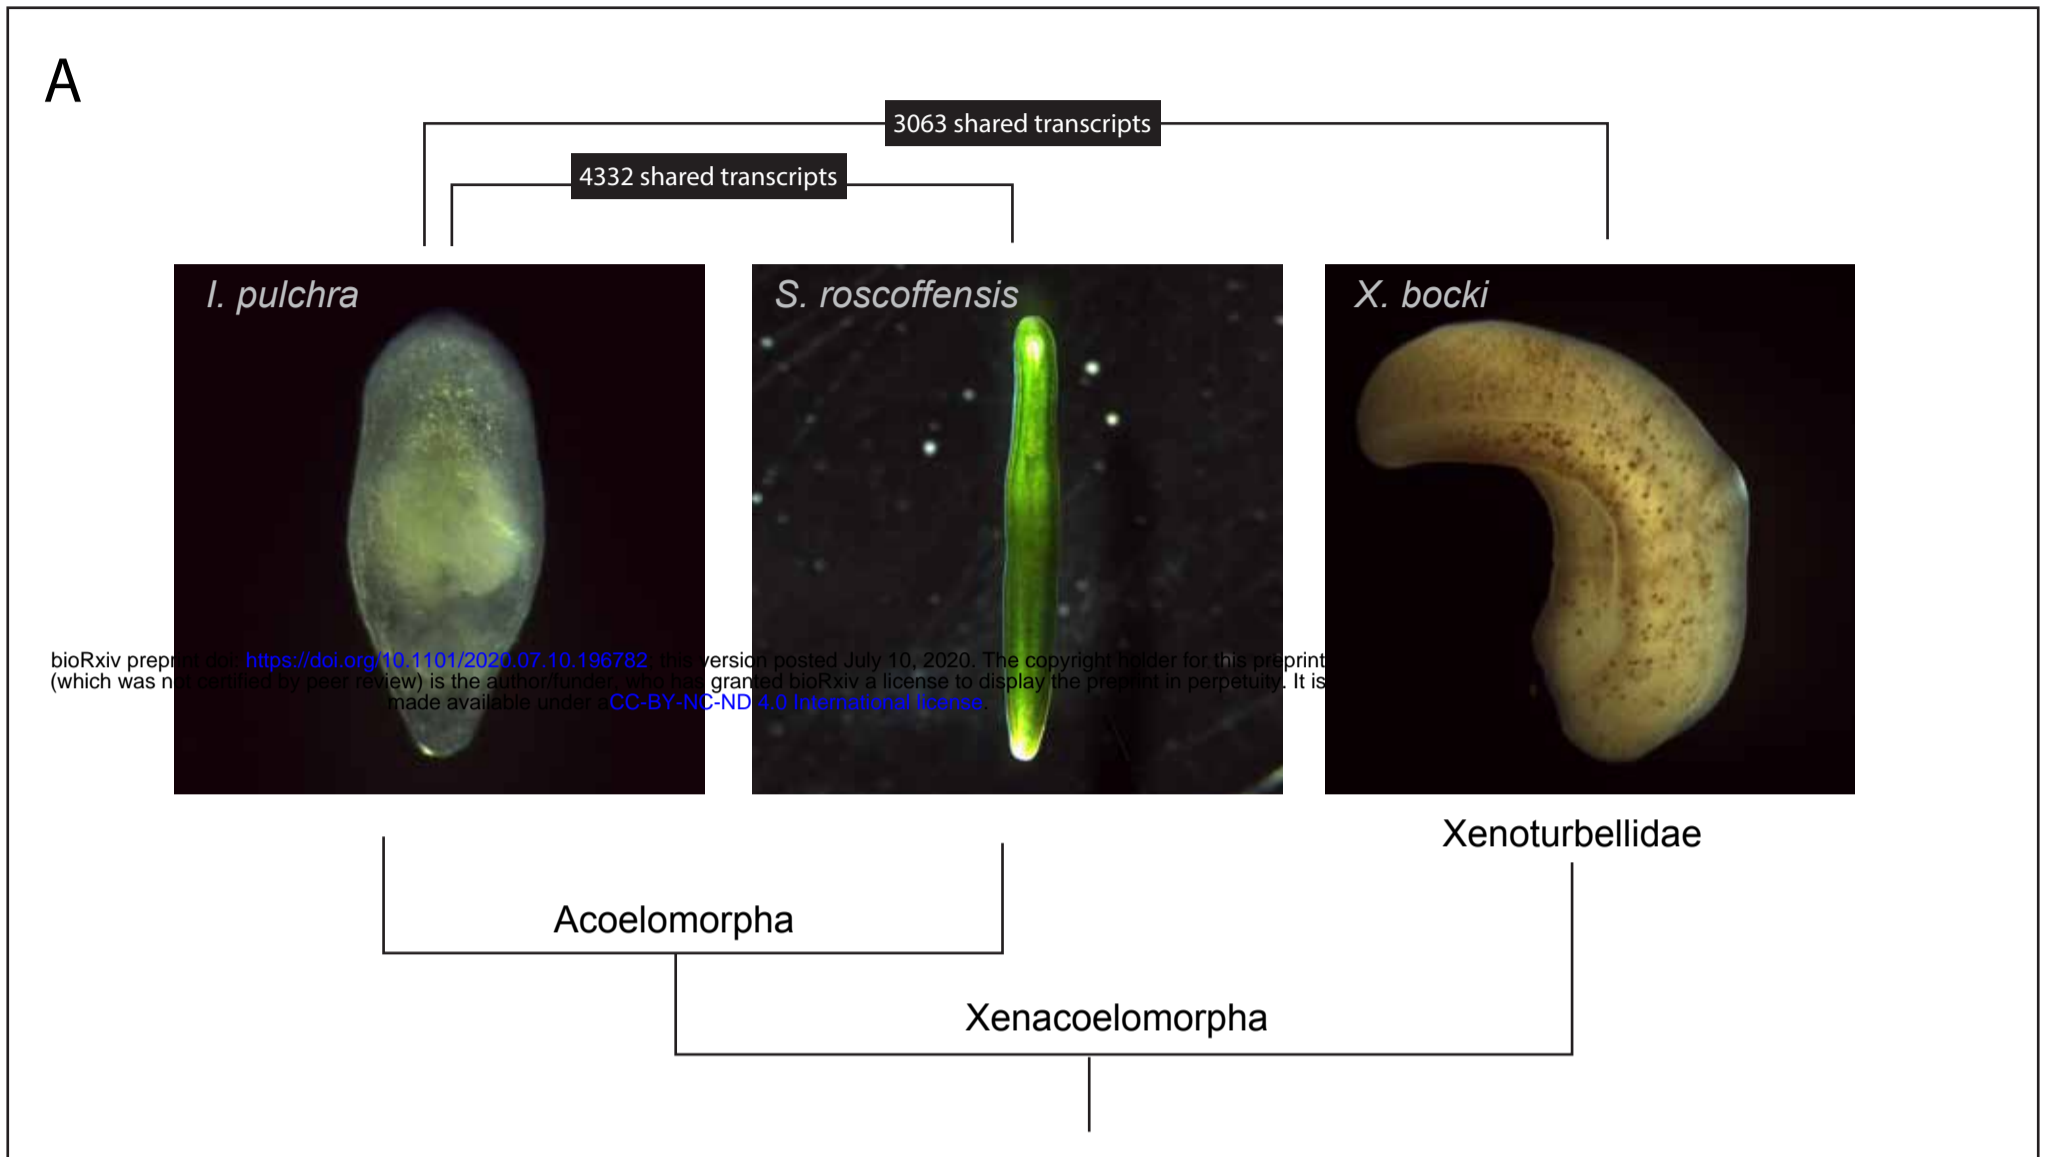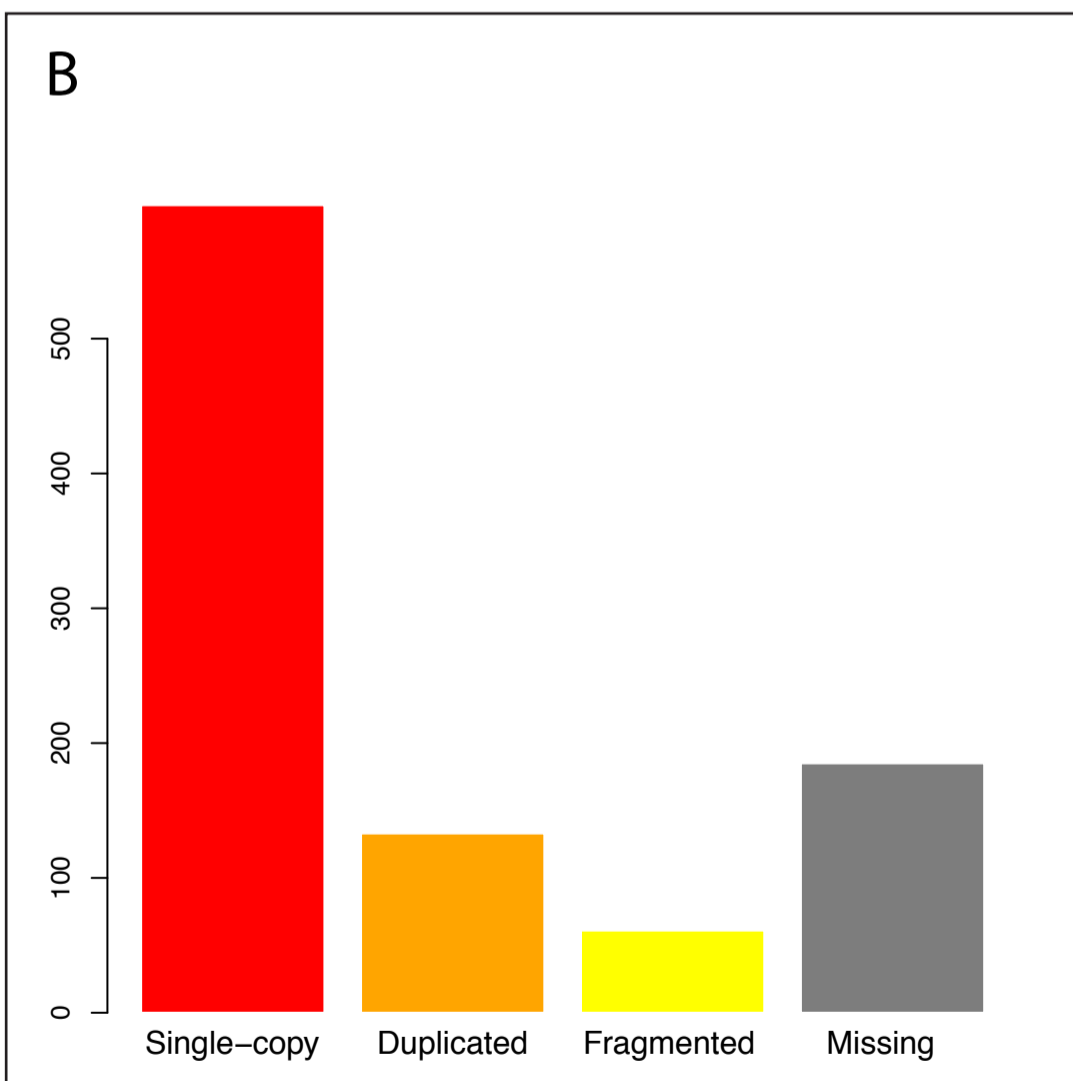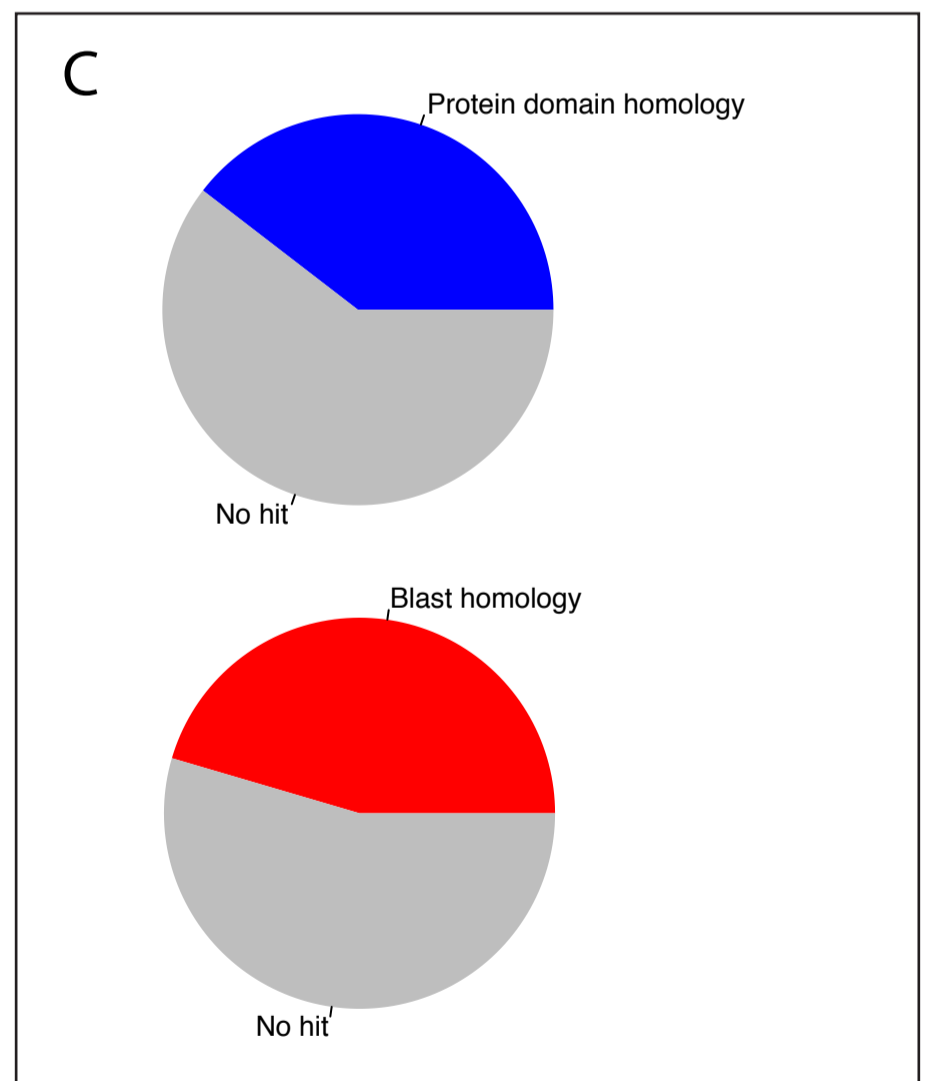

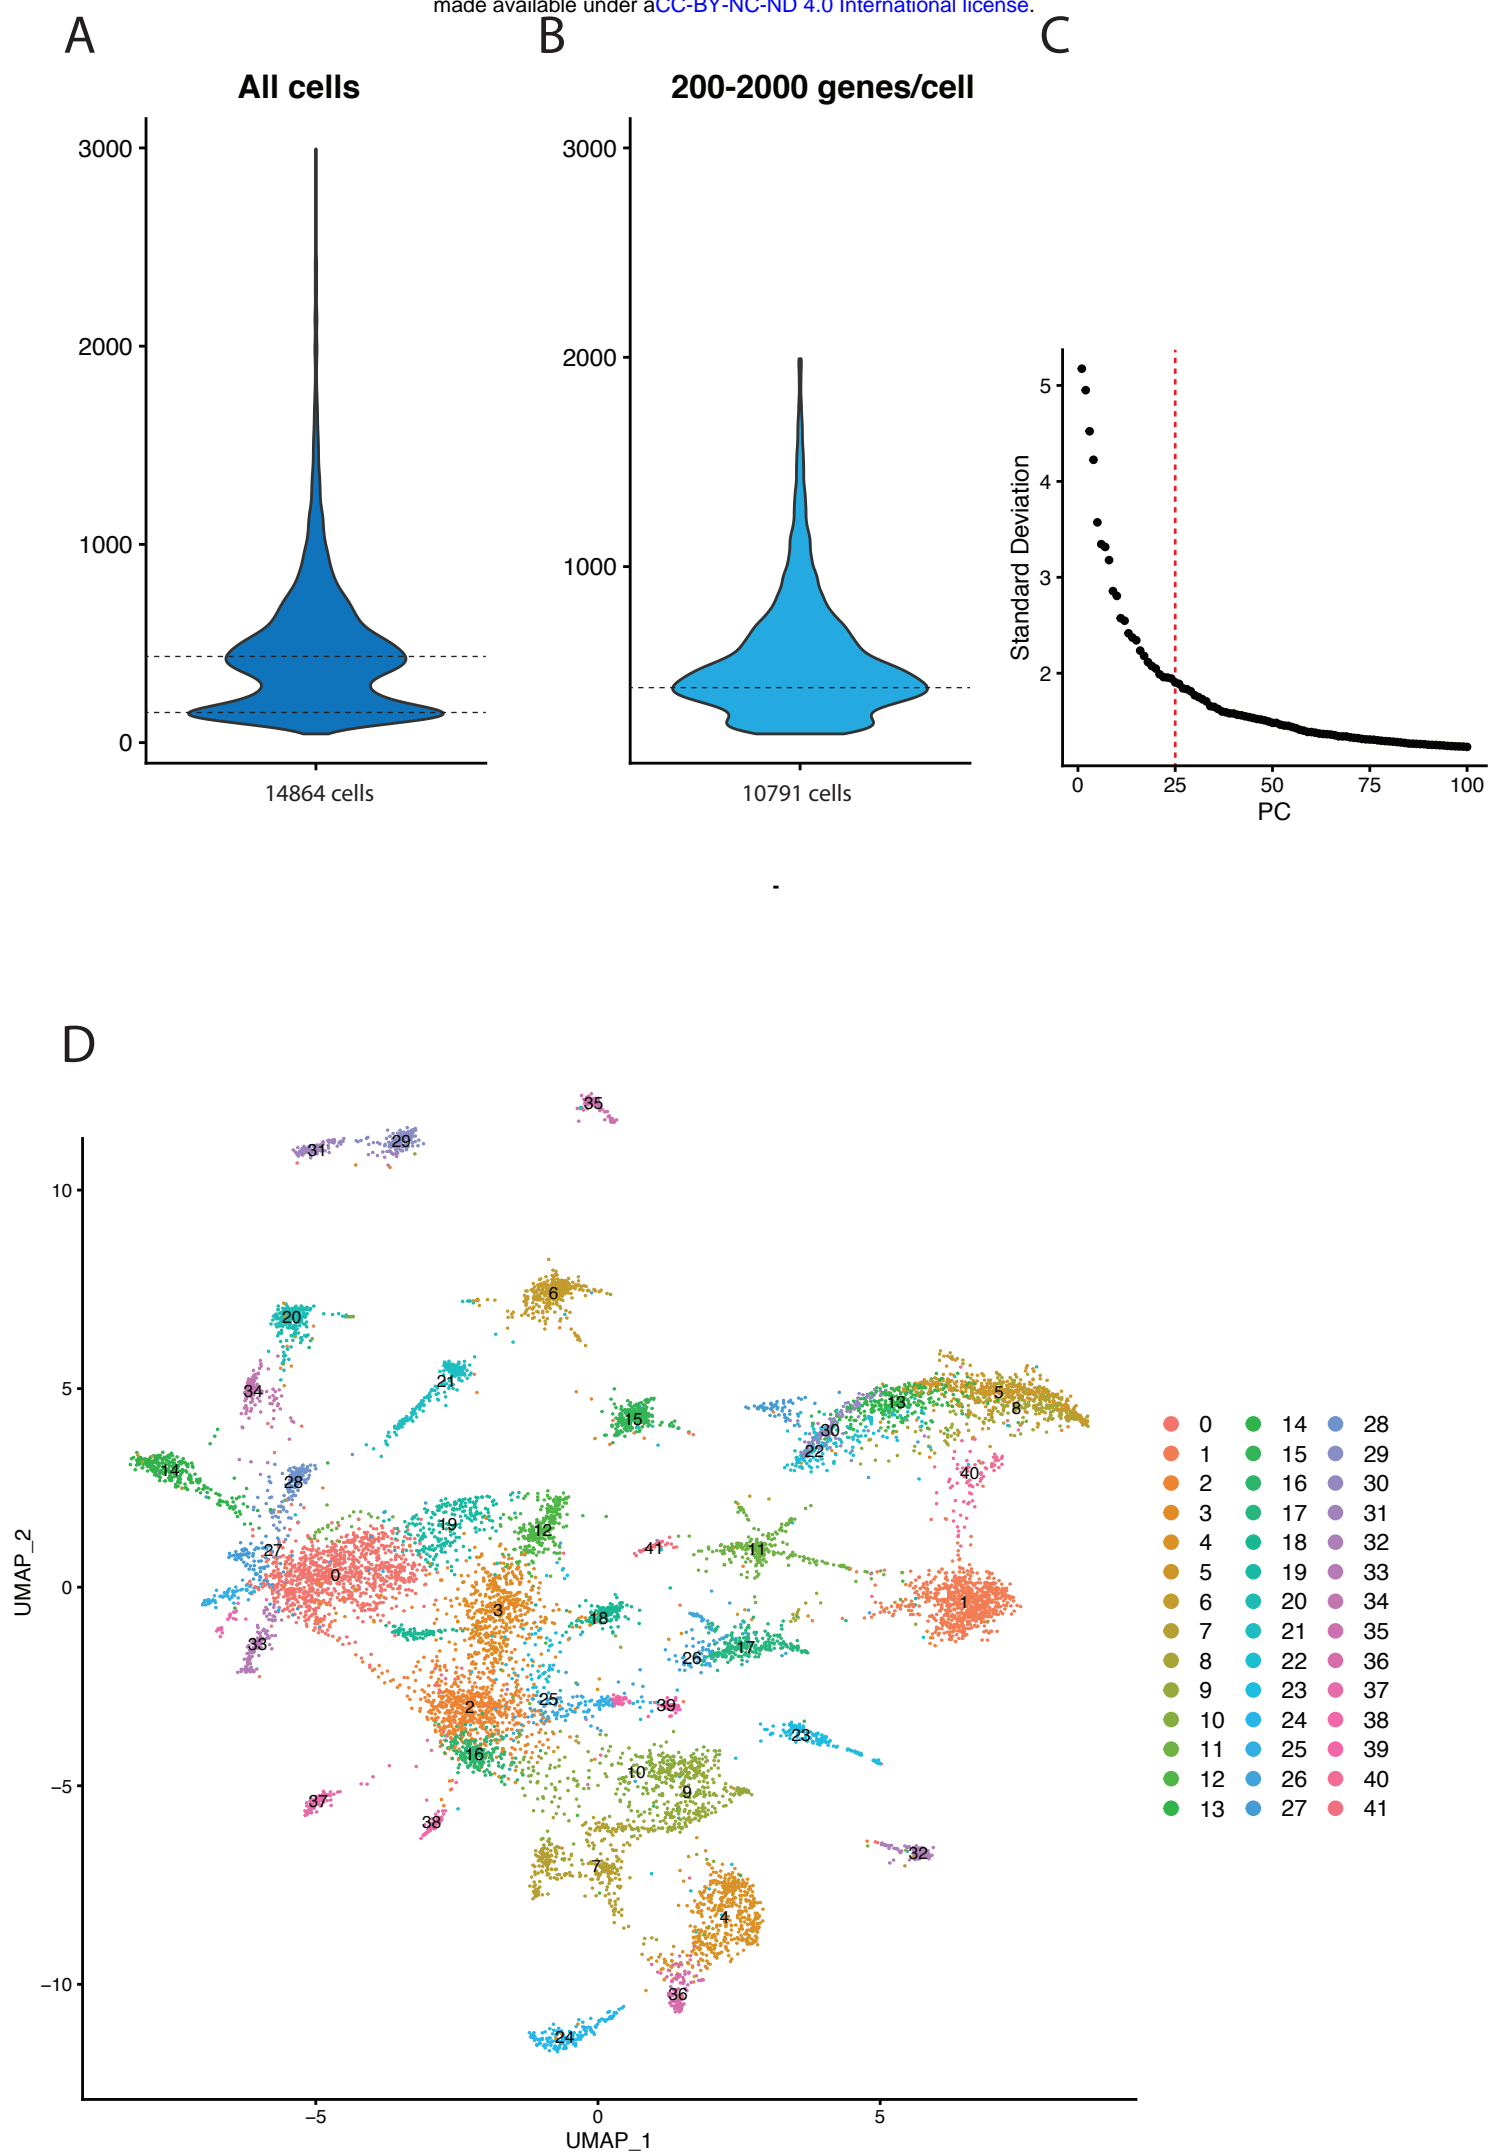

Supplementary Figure S3

A

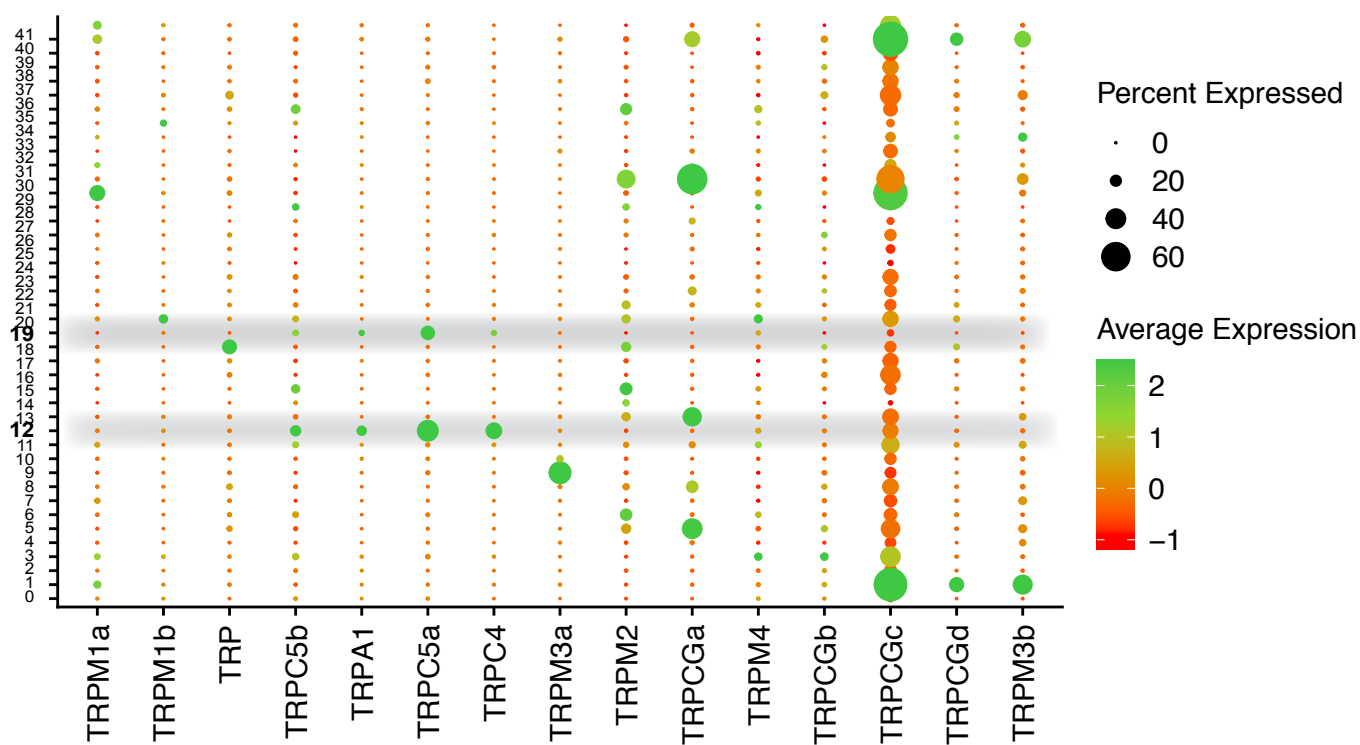

B

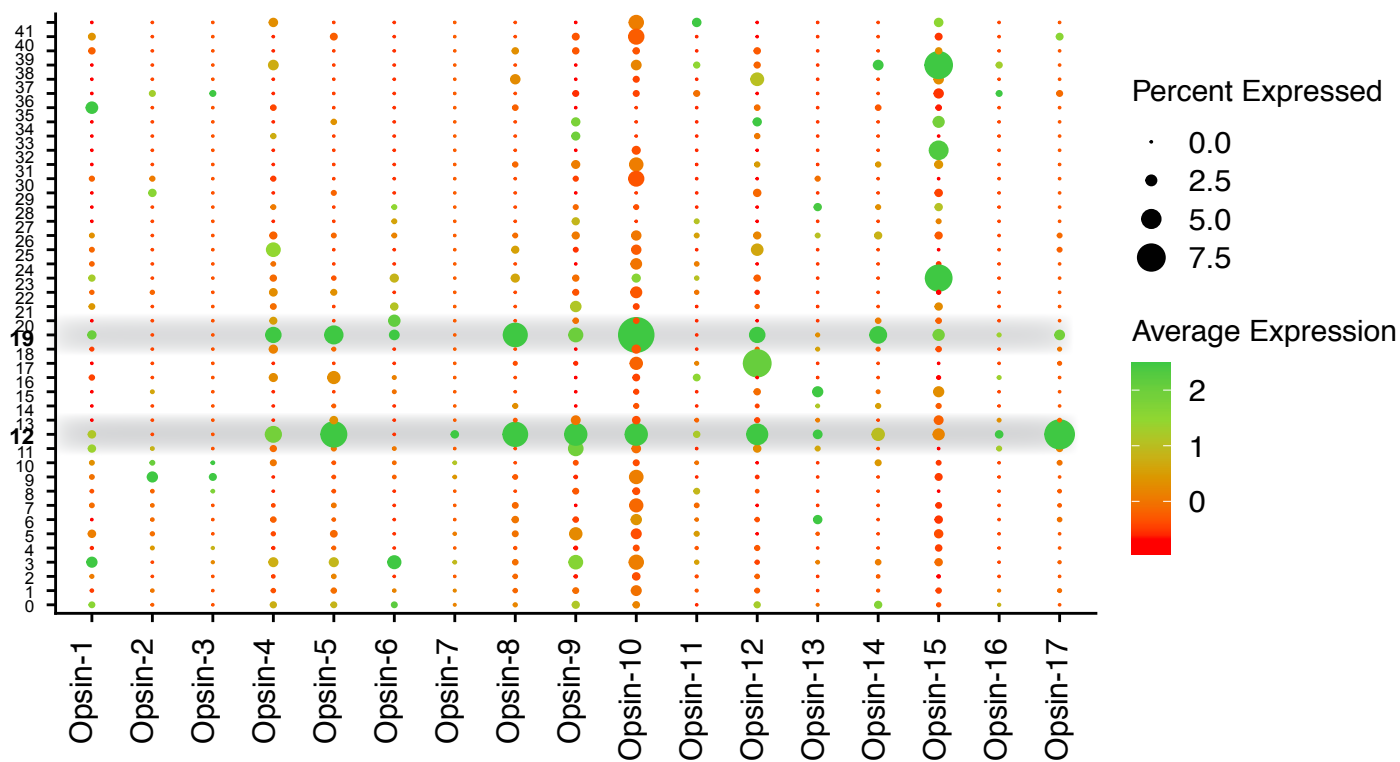

Source: https://www.biorxiv.org/content/10.1101/2020.07.10.196782v1.full.pdf
